# Supplementary material for: The synthesis, characterisation and cytotoxicity of bisintercalating (2,2′:6′,2′′-terpyridine)platinum(ii) complexes
Source: Royal Society of Chemistry journal article supplement (doi:10.1039/c4dt02773f), 2014-11-10
Supplement: c4dt02773f1.pdf [file c4dt02773f1.pdf]

## Supplementary Data

### **The synthesis, characterisation and cytotoxicity of bisintercalating (2,2':6',2''-terpyridine)platinum(II) complexes**

Benjamin. W. J. Harper<sup>ab</sup> and Janice R. Aldrich-Wright<sup>ab\*</sup>

a) Nanoscale Organisation and Dynamics Group

School of Science and Health

University of Western Sydney

Locked Bag 1797

Penrith South DC, 2751, NSW

Australia

b) School of Medicine,

University of Western Sydney

Locked Bag 1797,

Penrith South DC, 2751, NSW,

Australia

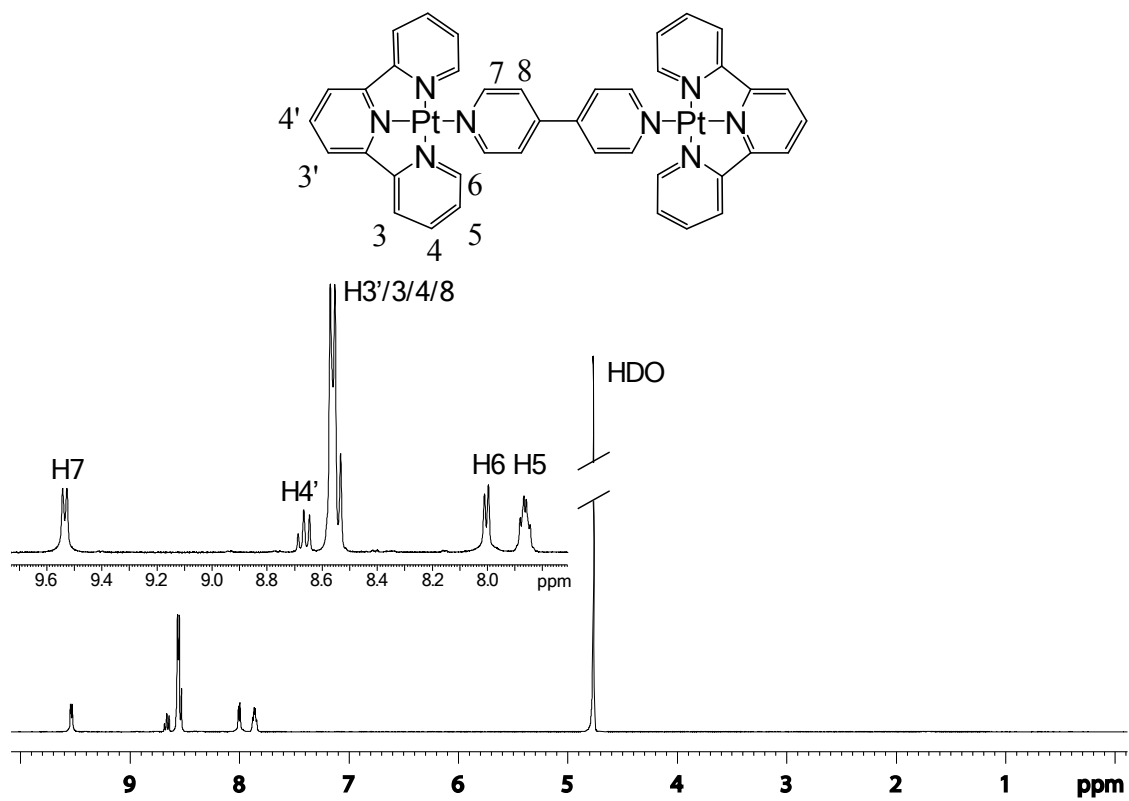

**Figure S-50:** The chemical structure, numbering and  $^1\text{H}$  spectrum of **1** in  $d_2\text{-D}_2\text{O}$ . Inset: The expansion of the aromatic region between 7.8 and 9.6 ppm.

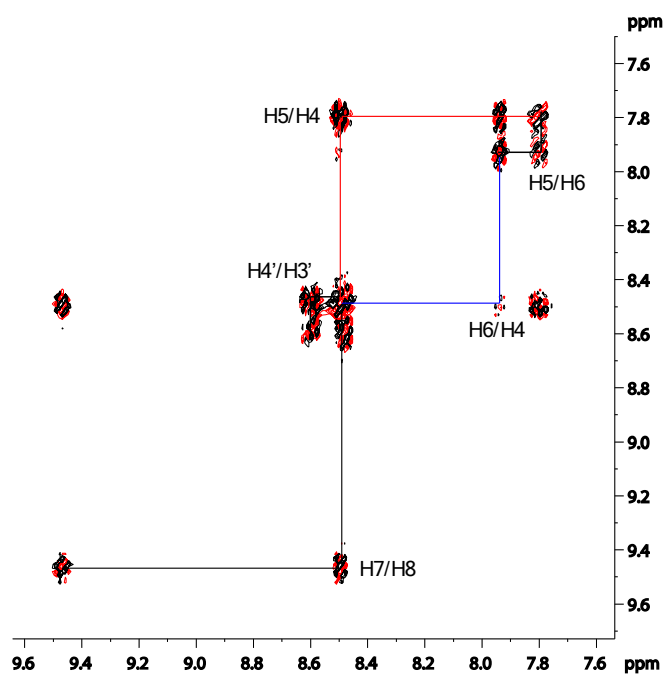

**Figure S-51:** The COSY spectrum of **1** in  $d_2$ -D<sub>2</sub>O with lines of connectivity highlighting cross correlations.

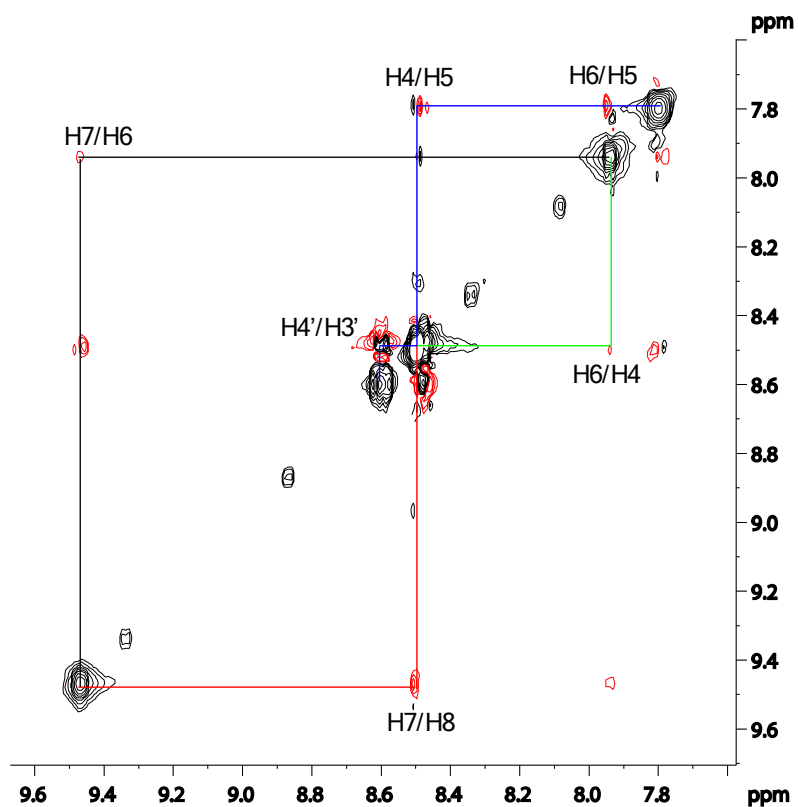

**Figure S-52:** The NOESY spectrum of **1** in  $d_2$ -D<sub>2</sub>O with lines of connectivity highlighting cross correlations.

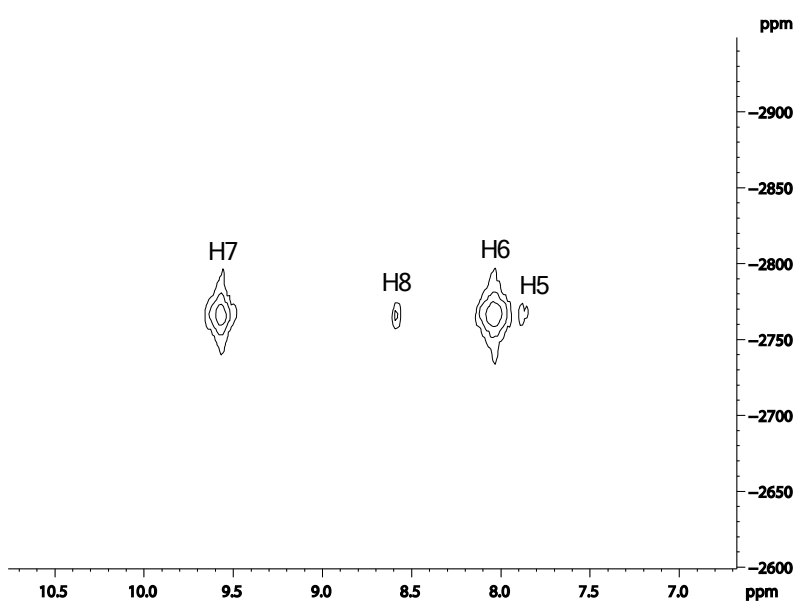

**Figure S-53:** The <sup>1</sup>H-<sup>195</sup>Pt HMQC spectrum of **1** in  $d_2$ -D<sub>2</sub>O.

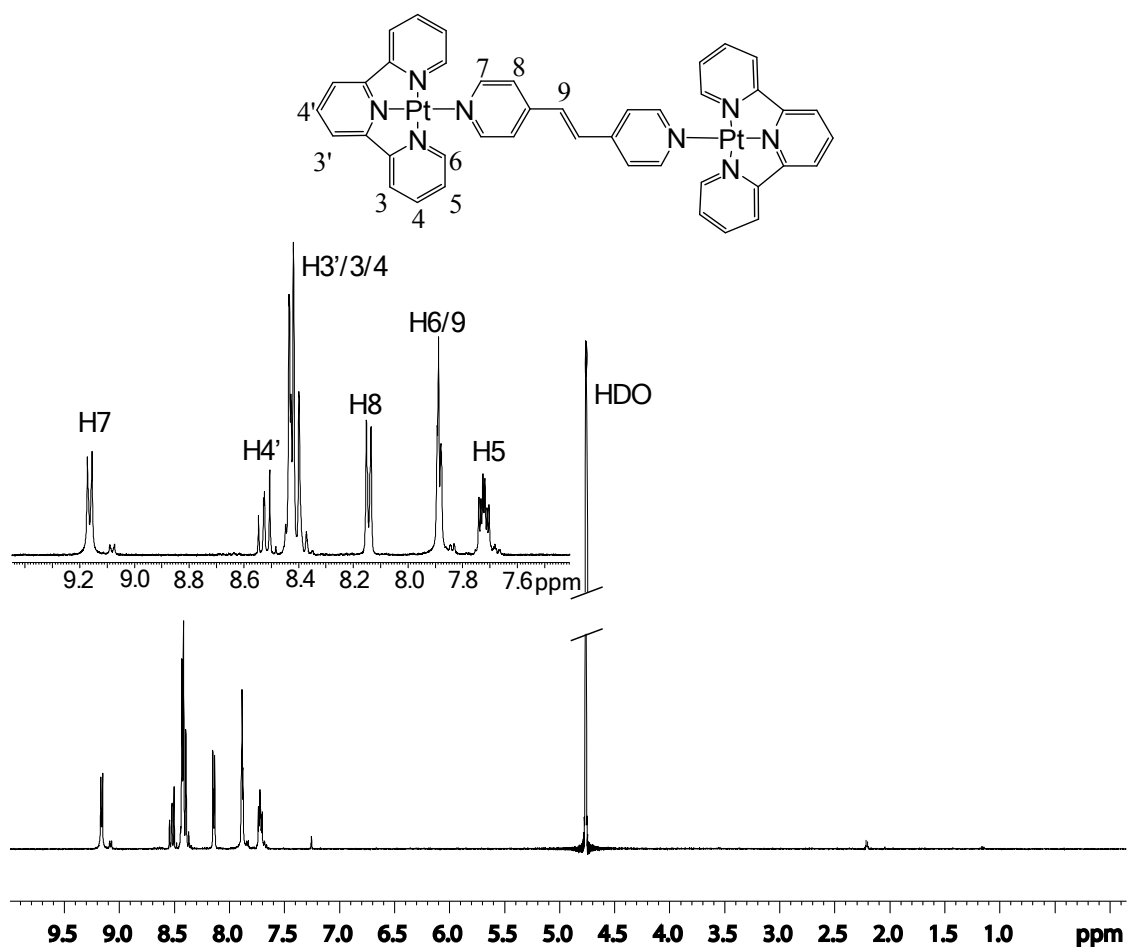

**Figure S-54:** The chemical structure, numbering and  $^1\text{H}$  spectrum of **2** in  $d_2\text{-D}_2\text{O}$ . Inset: The expansion of the aromatic region between 7.6 and 9.2 ppm.

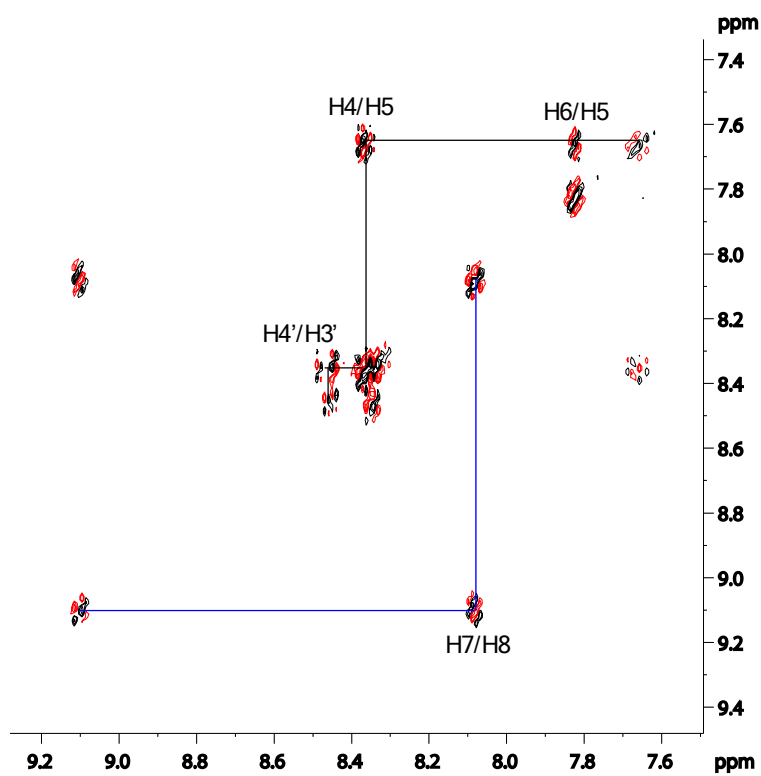

**Figure S-55:** The COSY spectrum of **2** in  $d_2$ -D<sub>2</sub>O with lines of connectivity highlighting cross correlations.

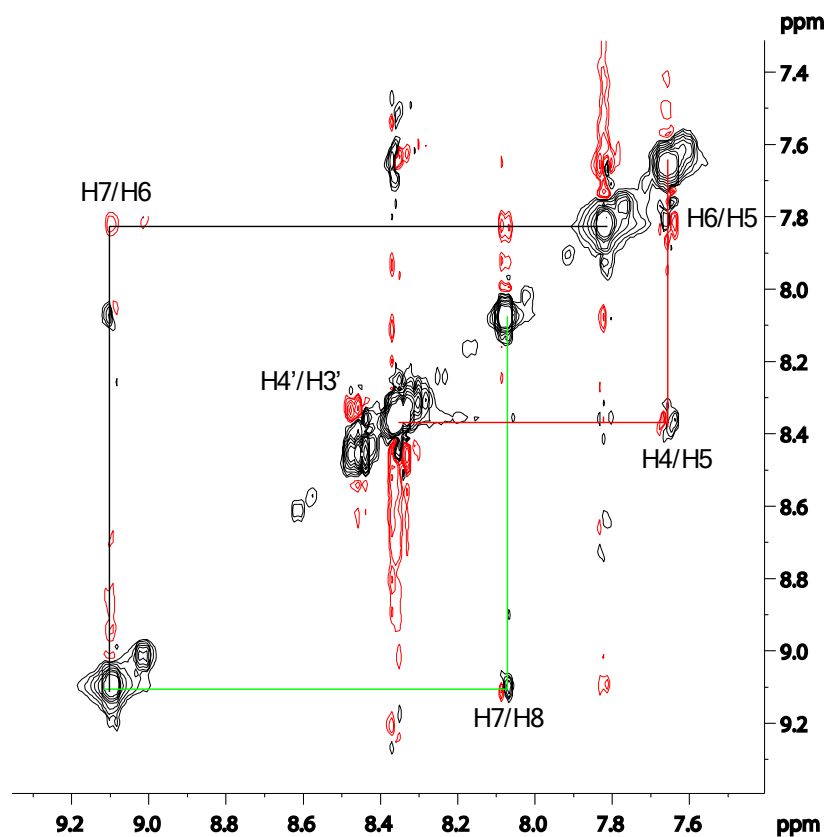

**Figure S-56:** The NOESY spectrum of **2** in  $d_2$ -D<sub>2</sub>O with lines of connectivity highlighting cross correlations.

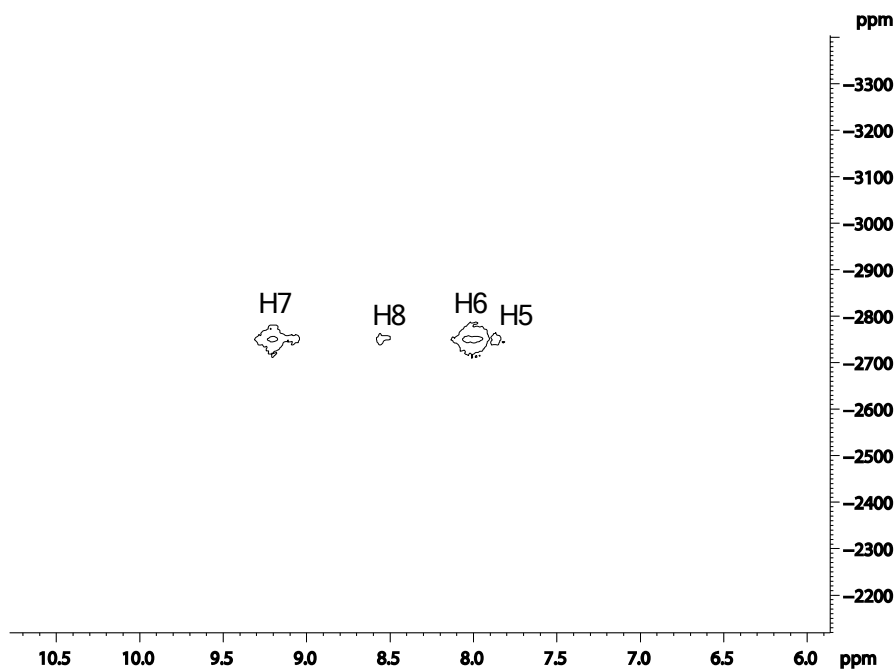

**Figure S-57:** The  $^1\text{H}$ - $^{195}\text{Pt}$  HMQC spectrum of **2** in  $d_2$ -D<sub>2</sub>O.

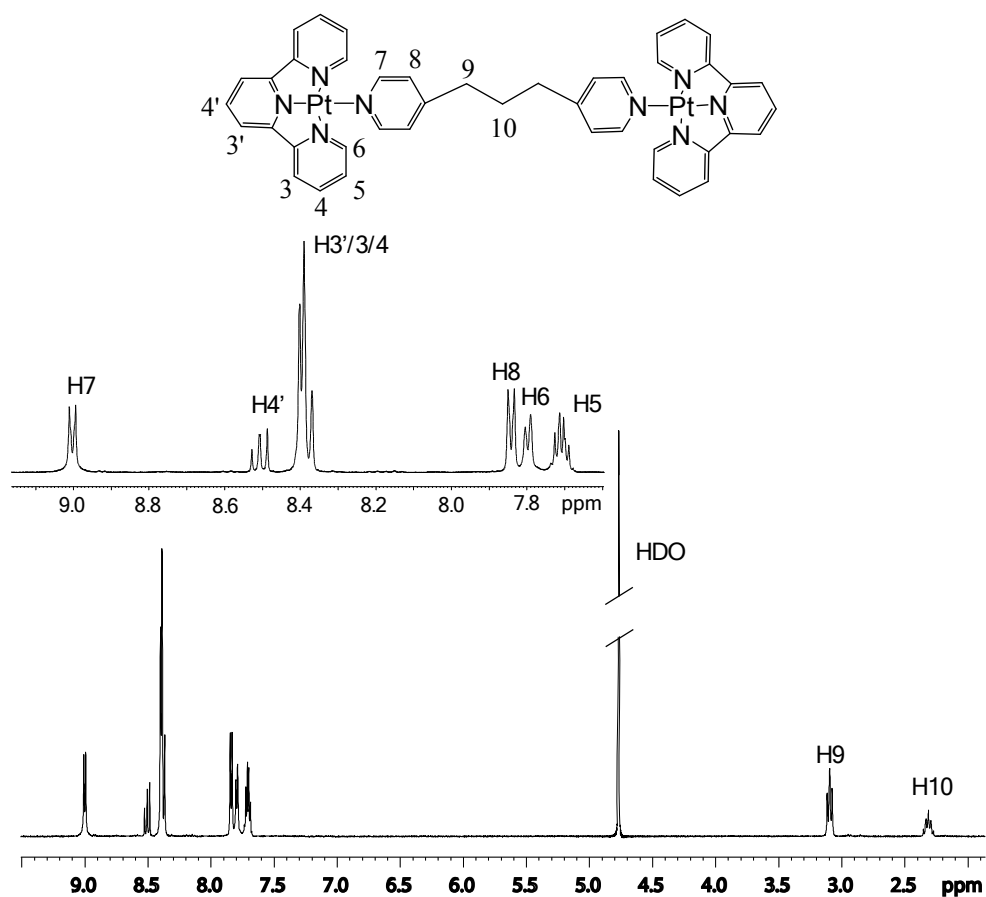

**Figure S-58:** The chemical structure, numbering and  $^1\text{H}$  spectrum of **3** in  $d_2\text{-D}_2\text{O}$ . Inset: The expansion of the aromatic region between 7.7 and 9.0 ppm.

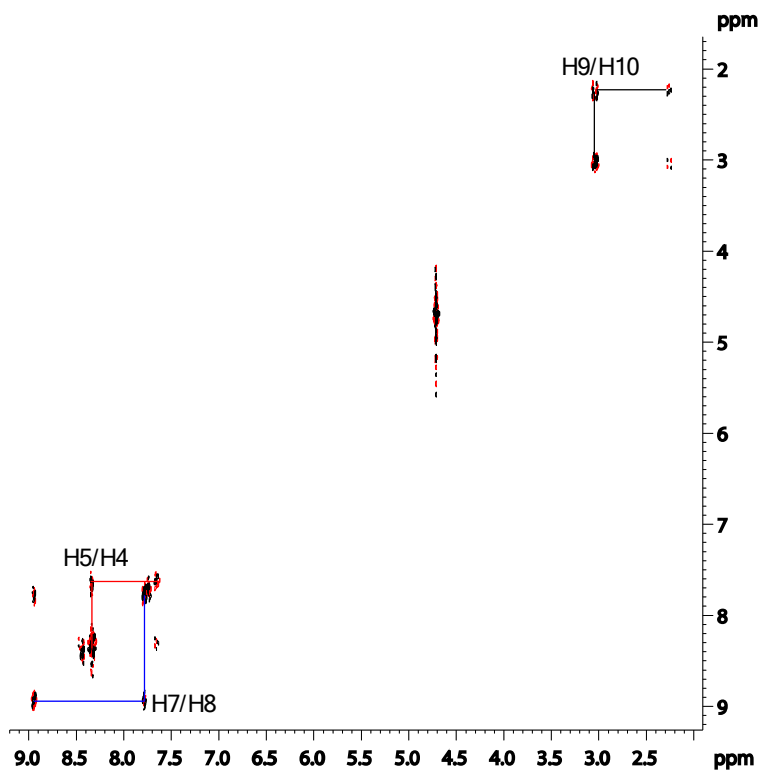

**Figure S-59:** The COSY spectrum of  $[\{\text{Pt}(\text{terpy})\}_2(\text{TMED})](\text{OTf})_4$  in  $d_2\text{-D}_2\text{O}$  with lines of connectivity highlighting cross correlations.

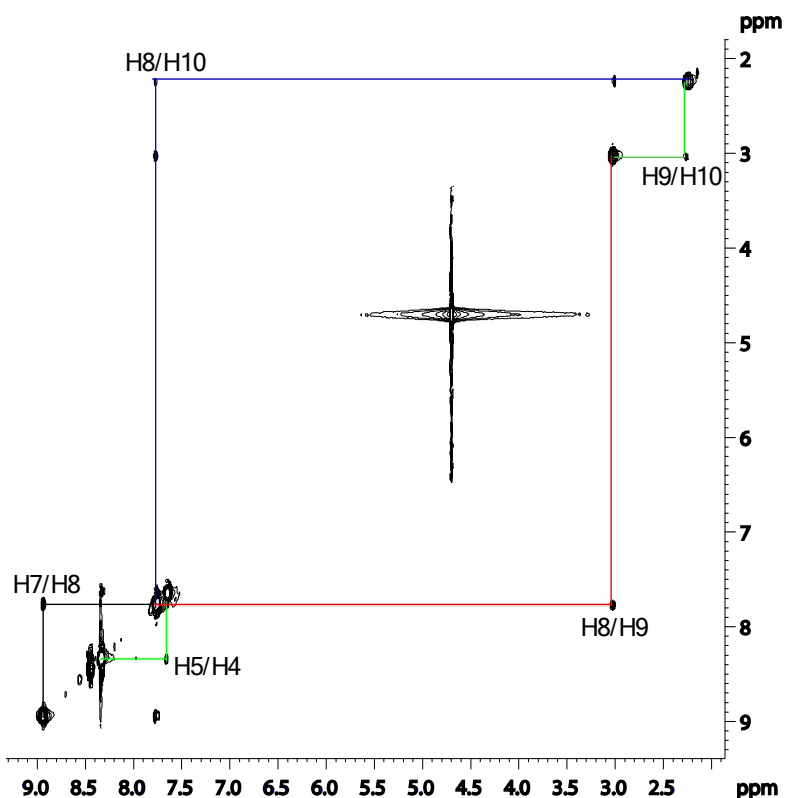

**Figure S-11:** The NOESY spectrum of **3** in  $d_2\text{-D}_2\text{O}$  with lines of connectivity highlighting cross correlations.

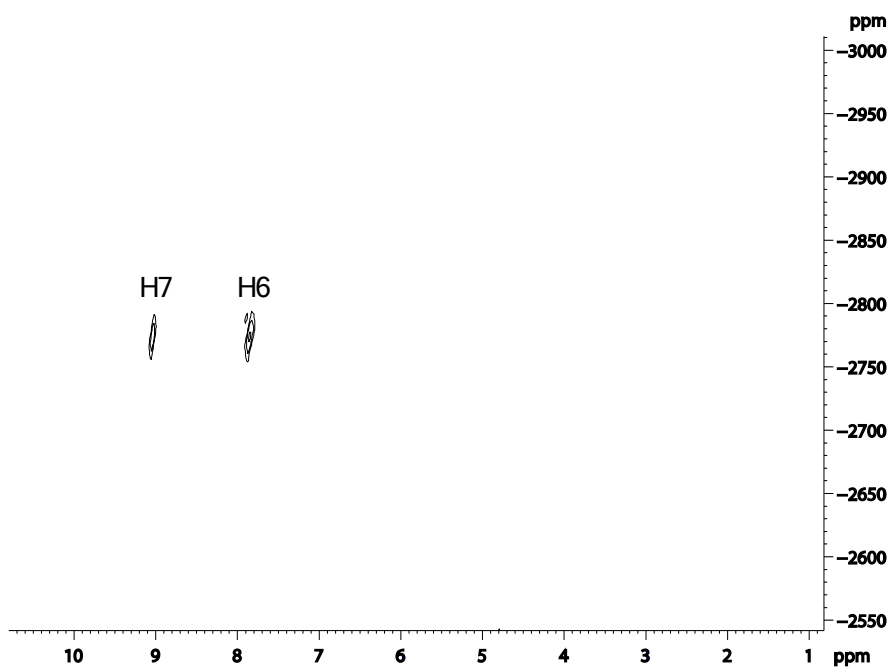

**Figure S-12:** The  $^1\text{H}\text{-}^{195}\text{Pt}$  HMQC spectrum of **3** in  $d_2\text{-D}_2\text{O}$ .

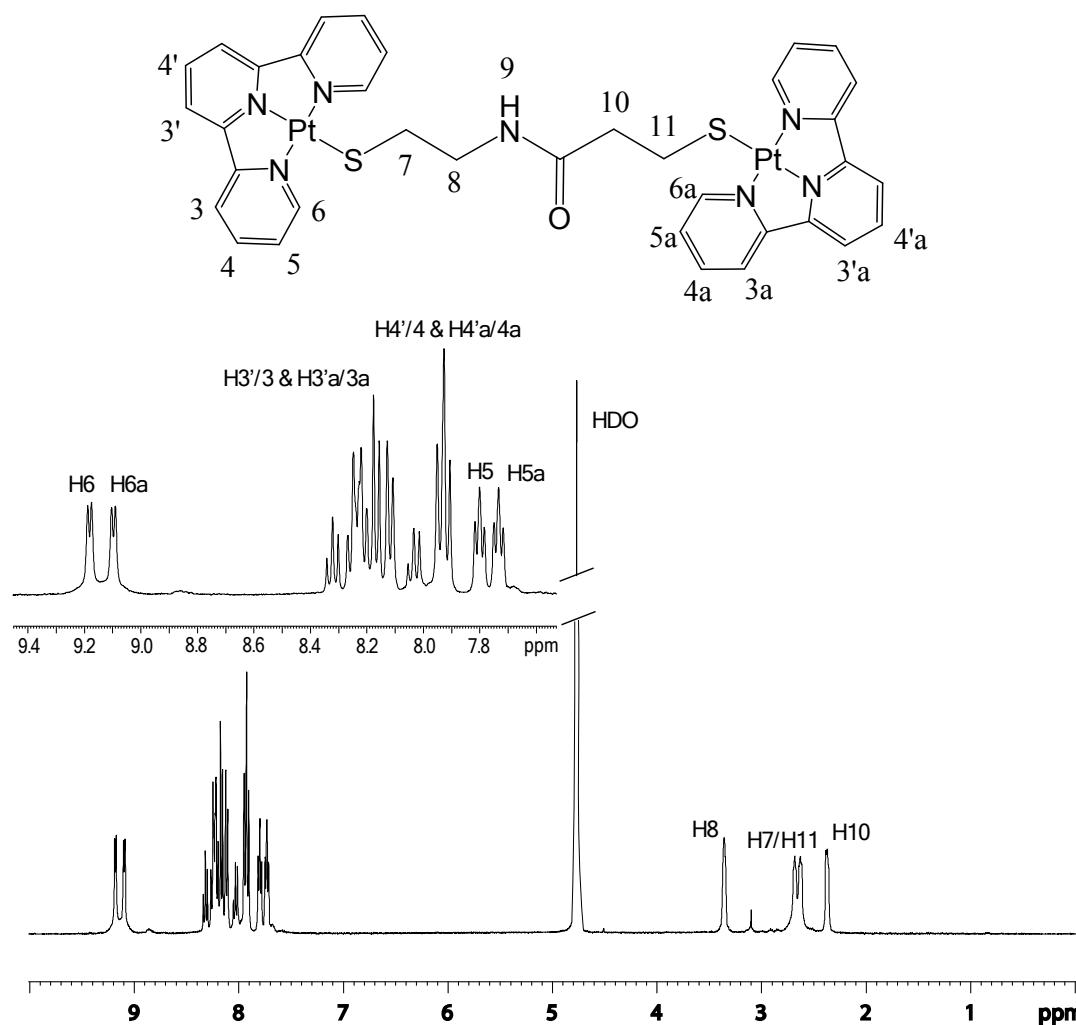

**Figure S-1:** The chemical structure, numbering  $^1\text{H}$  spectrum of **4** in  $d_2\text{-D}_2\text{O}$ . Inset: The expansion of the aromatic region between 7.6 and 9.4 ppm.



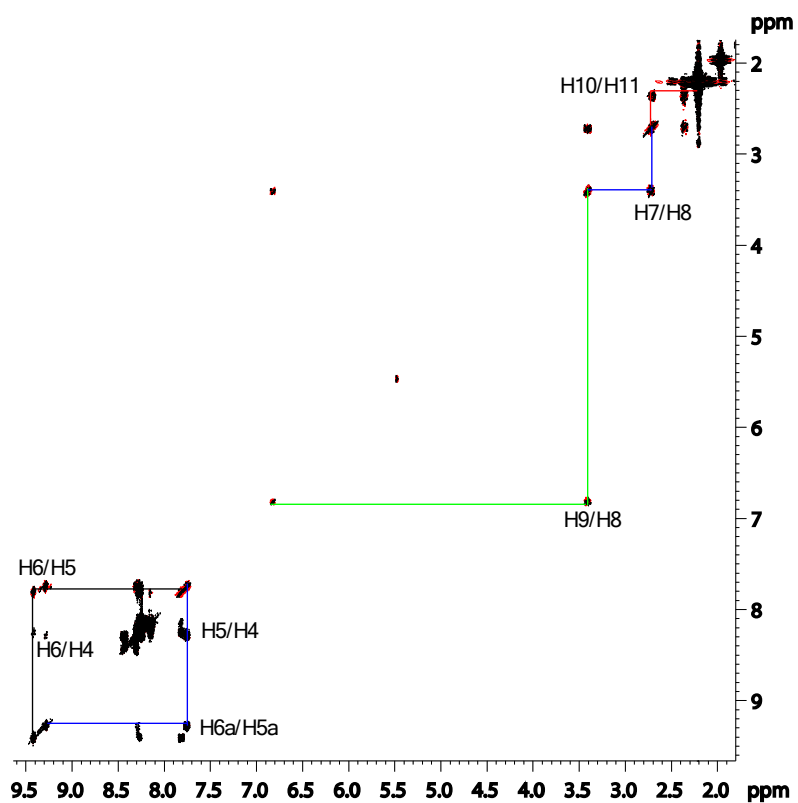

**Figure S-2:** The COSY spectrum of **4** in  $d_6$ -DMSO with lines of connectivity highlighting cross correlations.

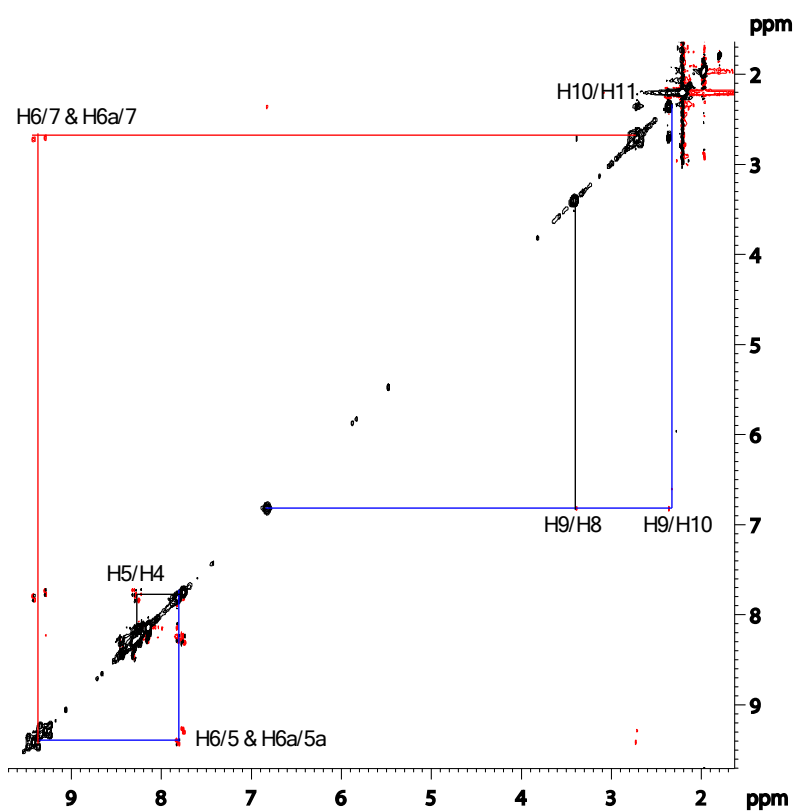

**Figure S-3:** The ROESY spectrum of **4** in  $d_6$ -DMSO with lines of connectivity highlighting cross correlations.

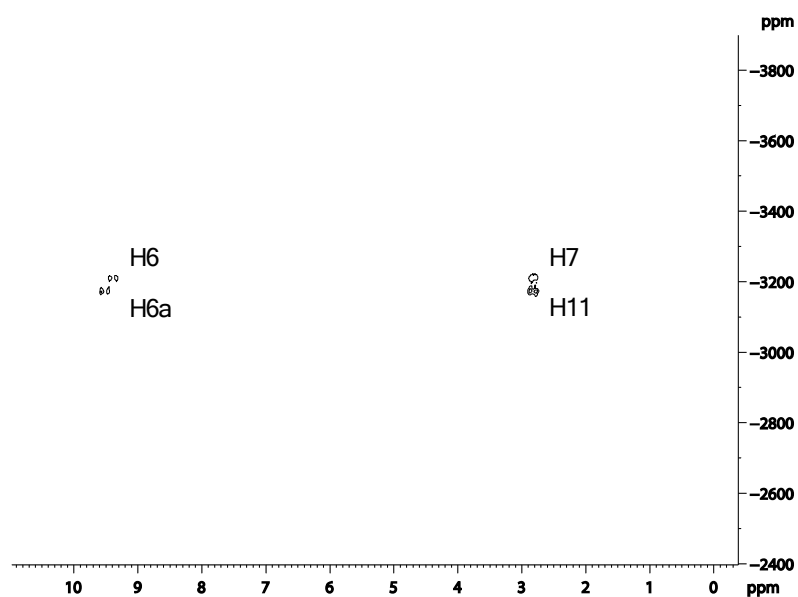

**Figure S-4:** The  $^1\text{H}$ - $^{195}\text{Pt}$  HMQC spectrum of **4** in  $d_6$ -DMSO.

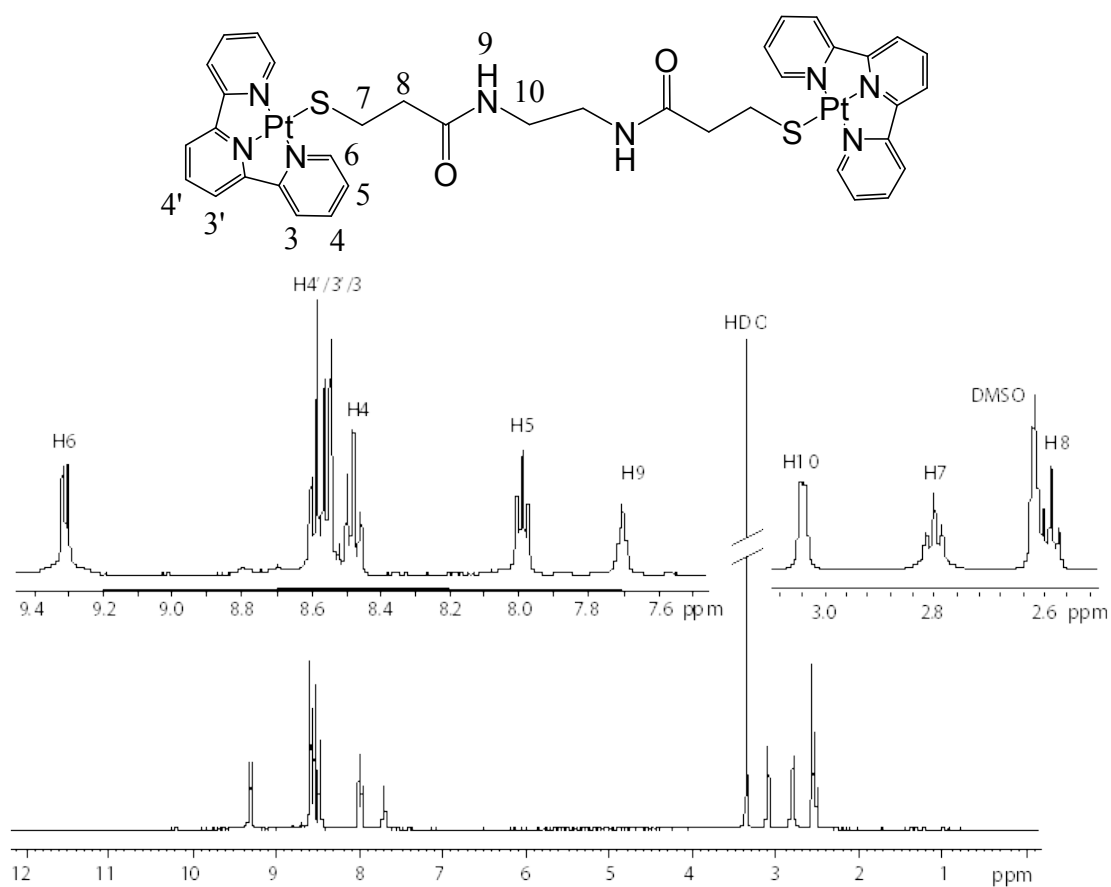

**Figure S-9:** The chemical structure, numbering and  $^1\text{H}$  spectrum of **5** in  $d_6$ -DMSO. Inset: The expansion of the aromatic region between 7.6 and 9.4 ppm and aliphatic region between 2.6 and 3.1 ppm.

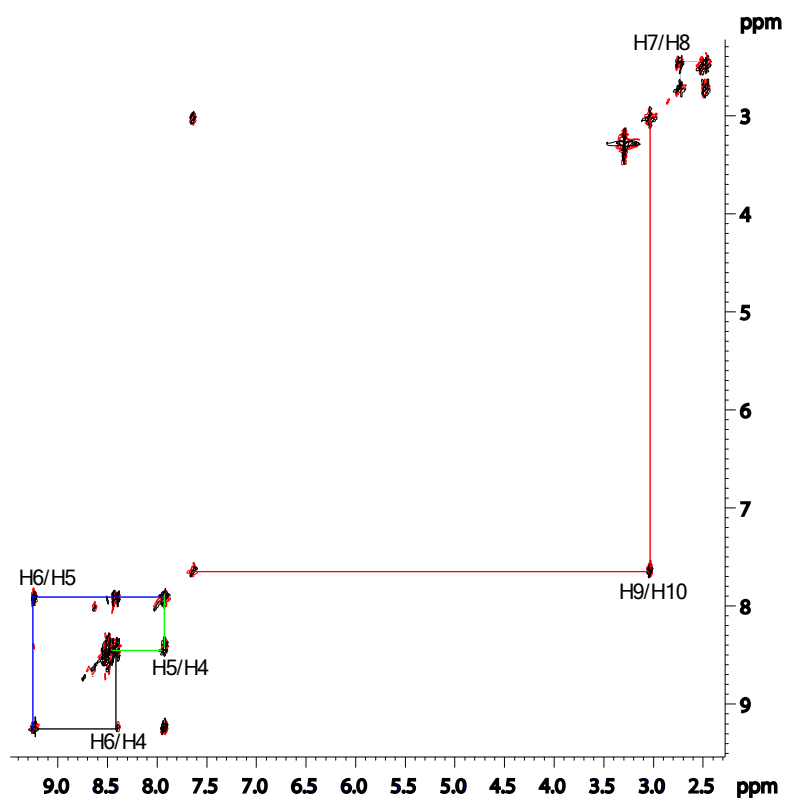

**Figure S-10:** The COSY spectrum of **5** in  $d_6$ -DMSO with lines of connectivity highlighting cross correlations.

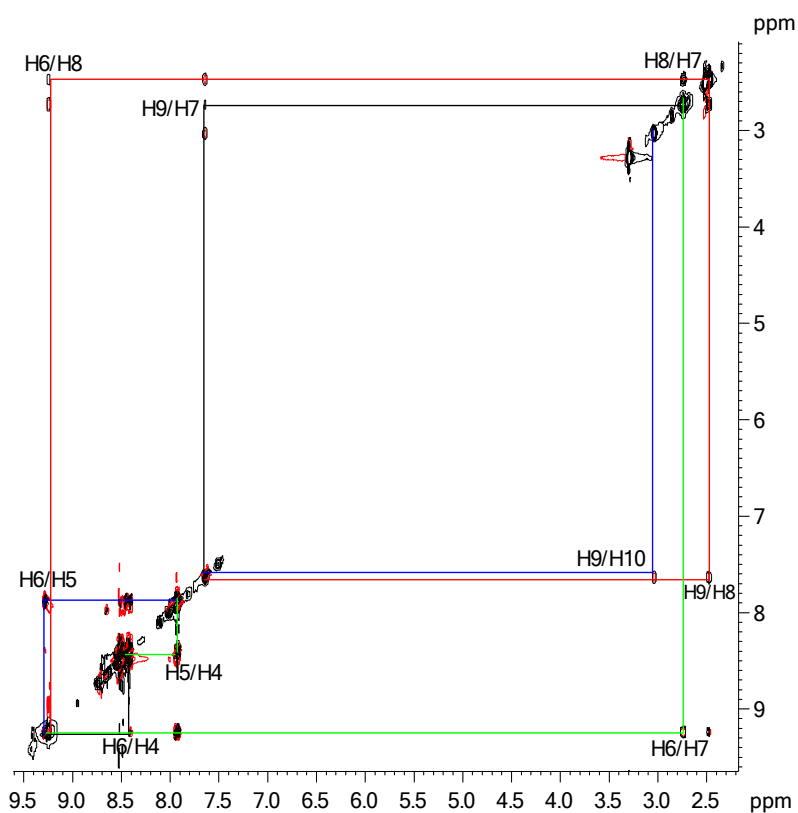

**Figure S-11:** The ROESY spectrum of **5** in  $d_6$ -DMSO with lines of connectivity highlighting cross correlations.

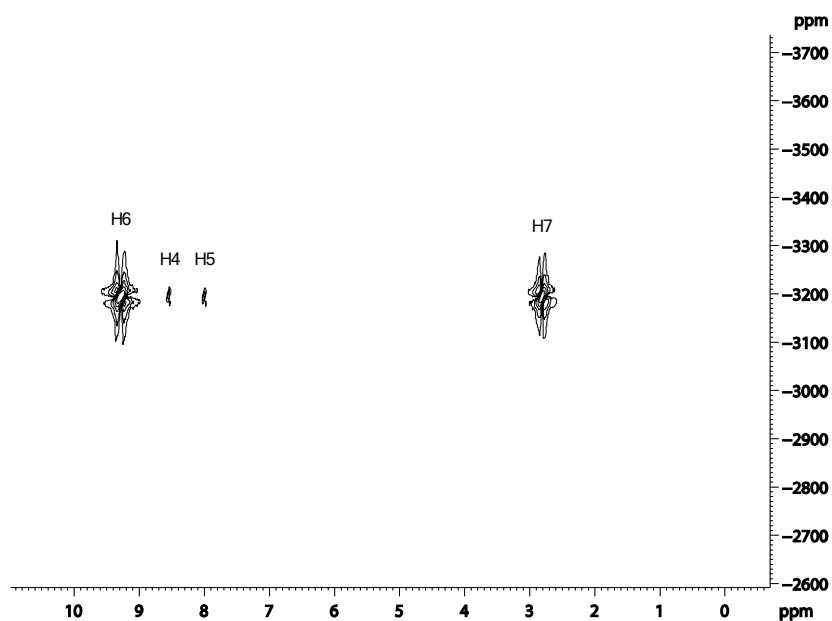

**Figure S-12:** The  $^1\text{H}$ - $^{195}\text{Pt}$  HMQC spectrum of **5** in  $d_6$ -DMSO.

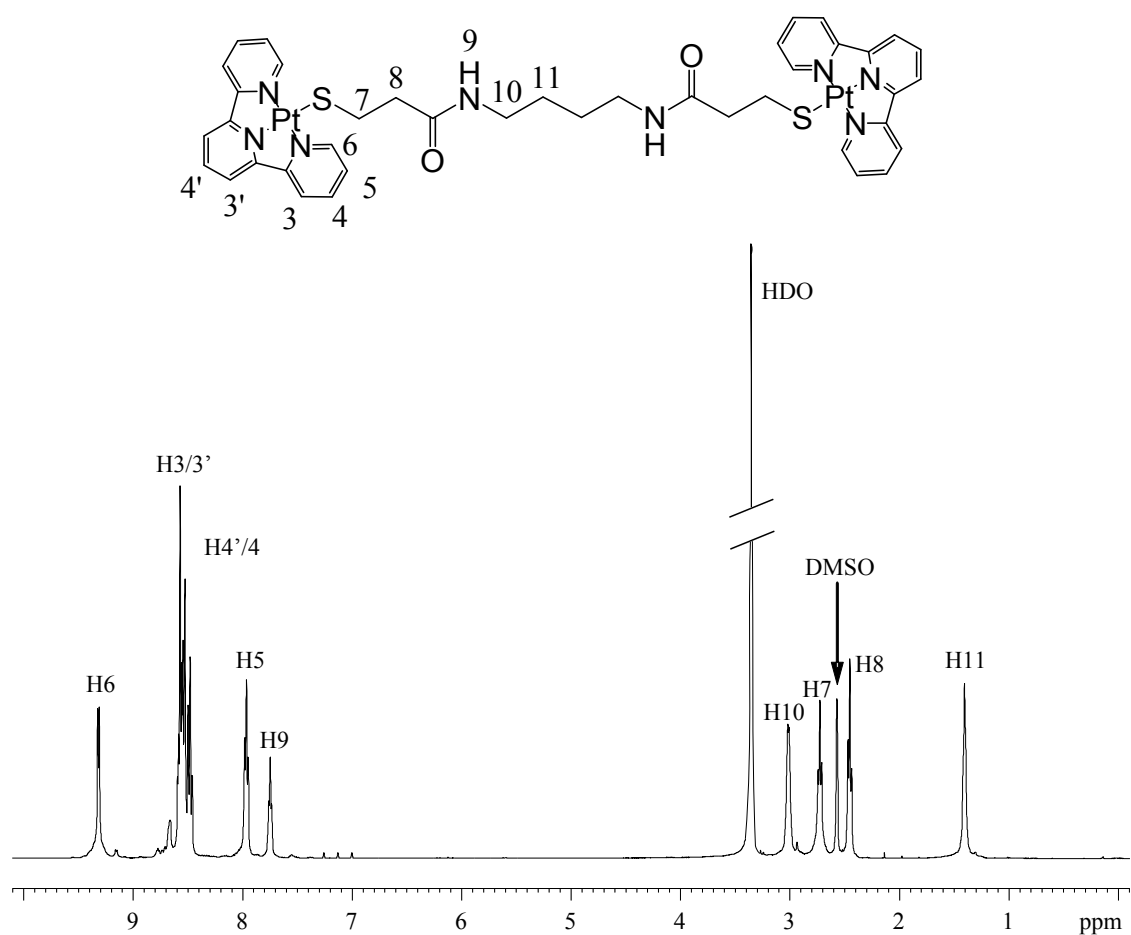

**Figure S-13:** The chemical structure, numbering and  $^1\text{H}$  spectrum of **6** in  $d_6$ -DMSO.

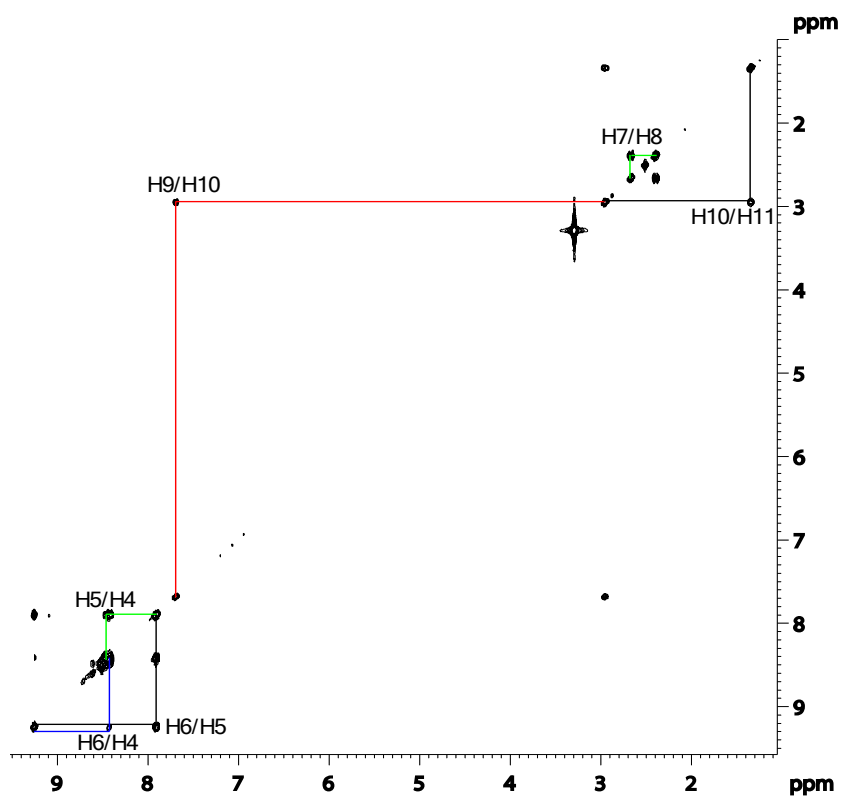

**Figure S-14:** The COSY spectrum of **6** in  $d_6$ -DMSO with lines of connectivity highlighting cross correlations.

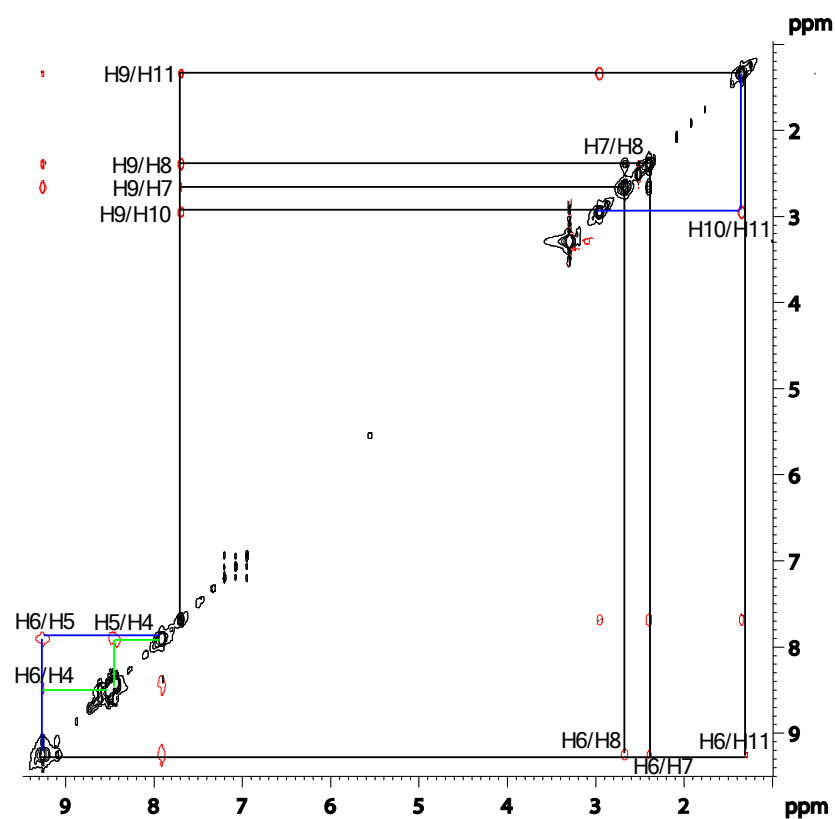

**Figure S-15:** The ROESY spectrum of **6** in  $d_6$ -DMSO with lines of connectivity highlighting cross correlations.

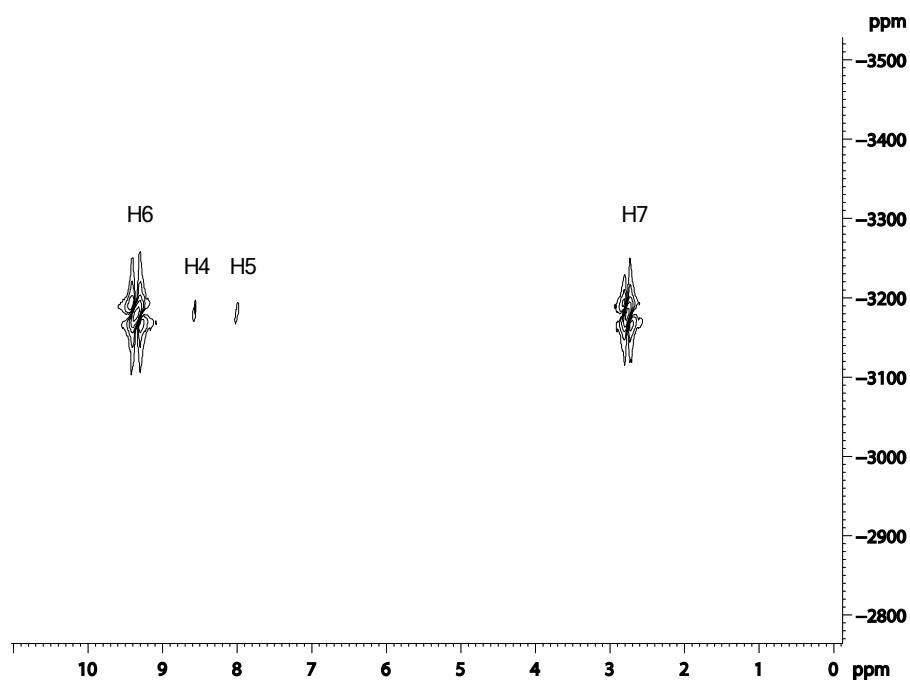

**Figure S-16:** The  $^1\text{H}$ - $^{195}\text{Pt}$  spectrum of **6** in  $d_6$ -DMSO.

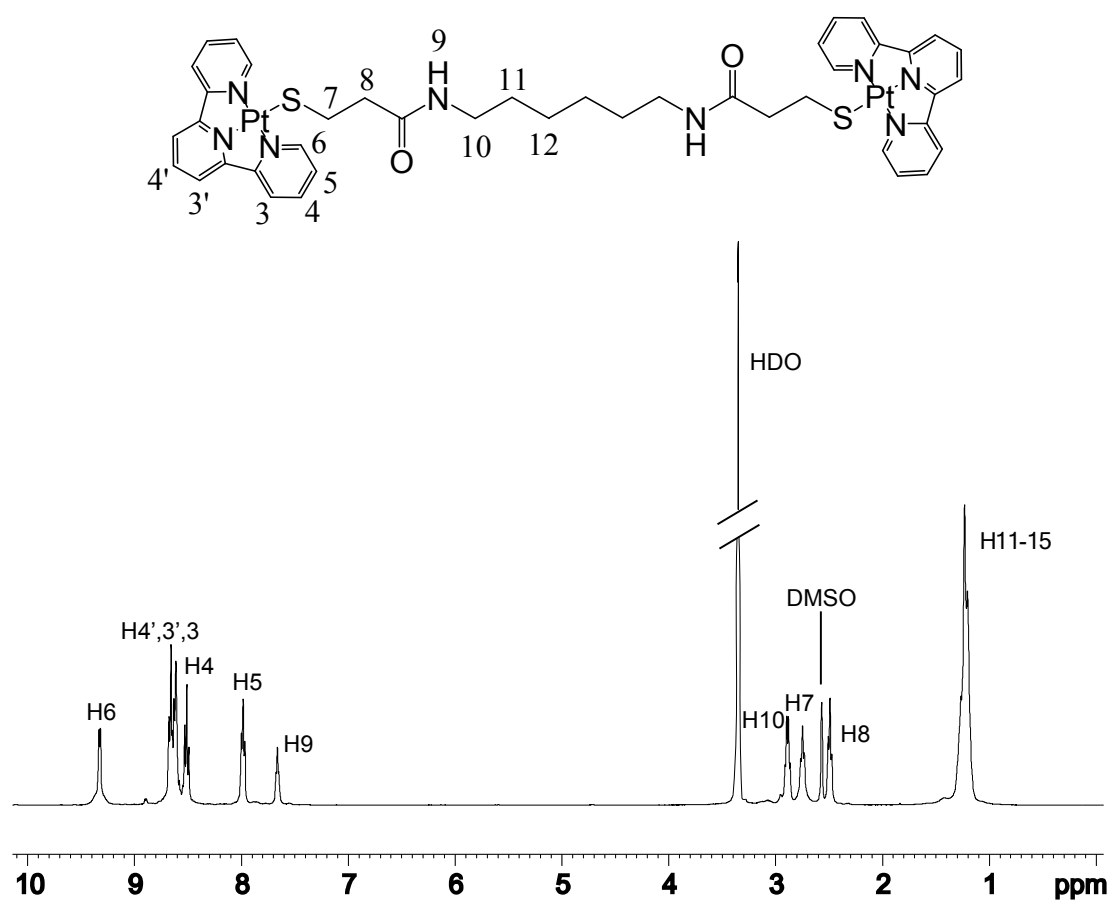

**Figure S-17:** The chemical structure, numbering and  $^1\text{H}$  spectrum of **7** in  $d_6$ -DMSO.

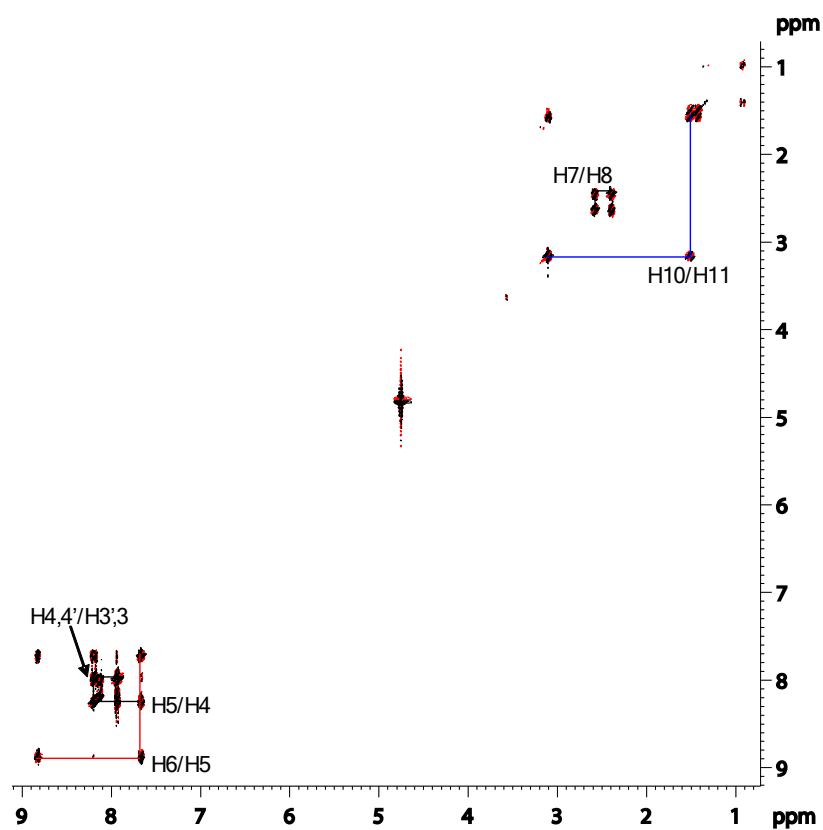

**Figure S-18:** The COSY spectrum of 7 in  $d_6$ -DMSO with lines of connectivity highlighting cross correlations.

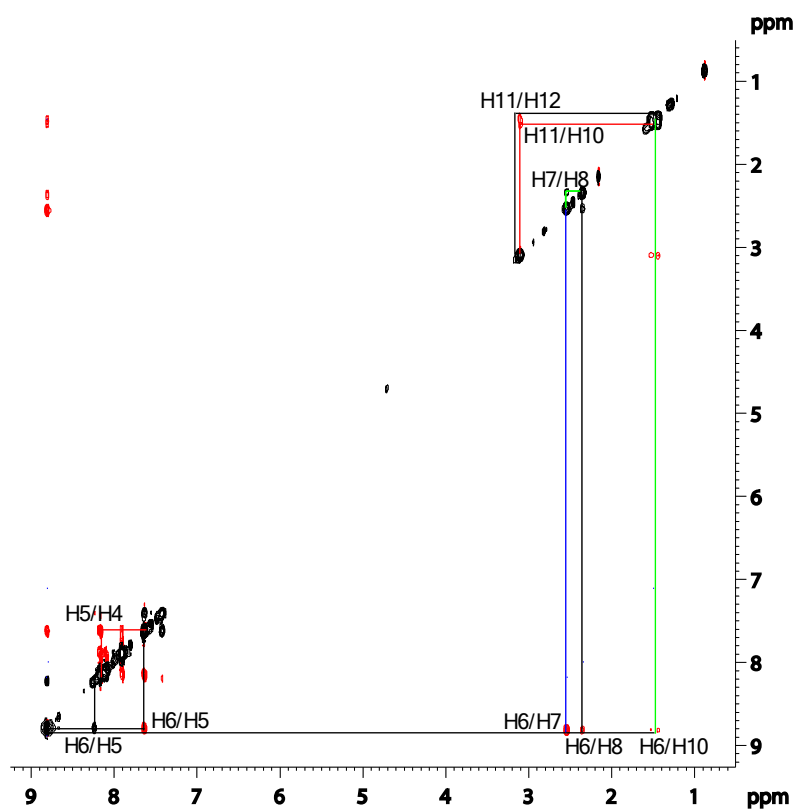

**Figure S-19:** The ROESY spectrum of 7 in  $d_6$ -DMSO with lines of connectivity highlighting cross correlations.

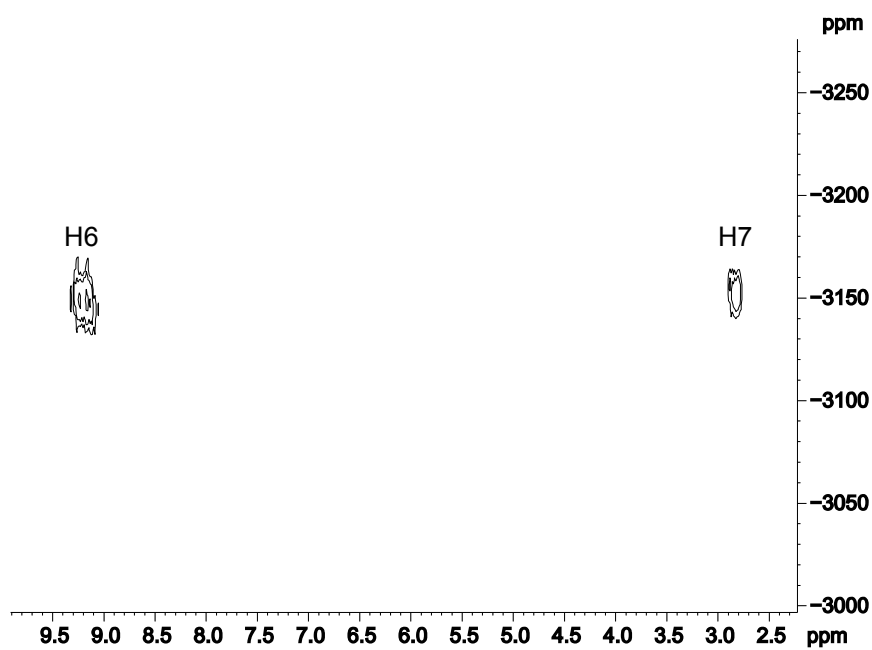

**Figure S-20:** The  $^1\text{H}$ - $^{195}\text{Pt}$  HMQC spectrum of **7** in  $d_6$ -DMSO.

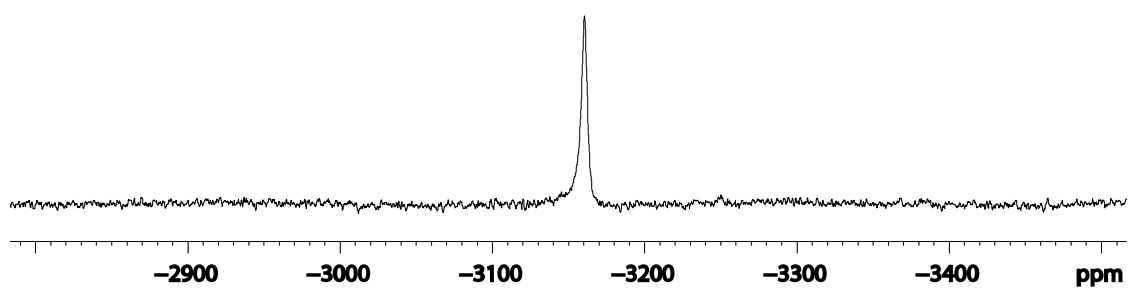

**Figure S-21:** The  $^{195}\text{Pt}$  spectrum of **7** in  $d_6$ -DMSO.



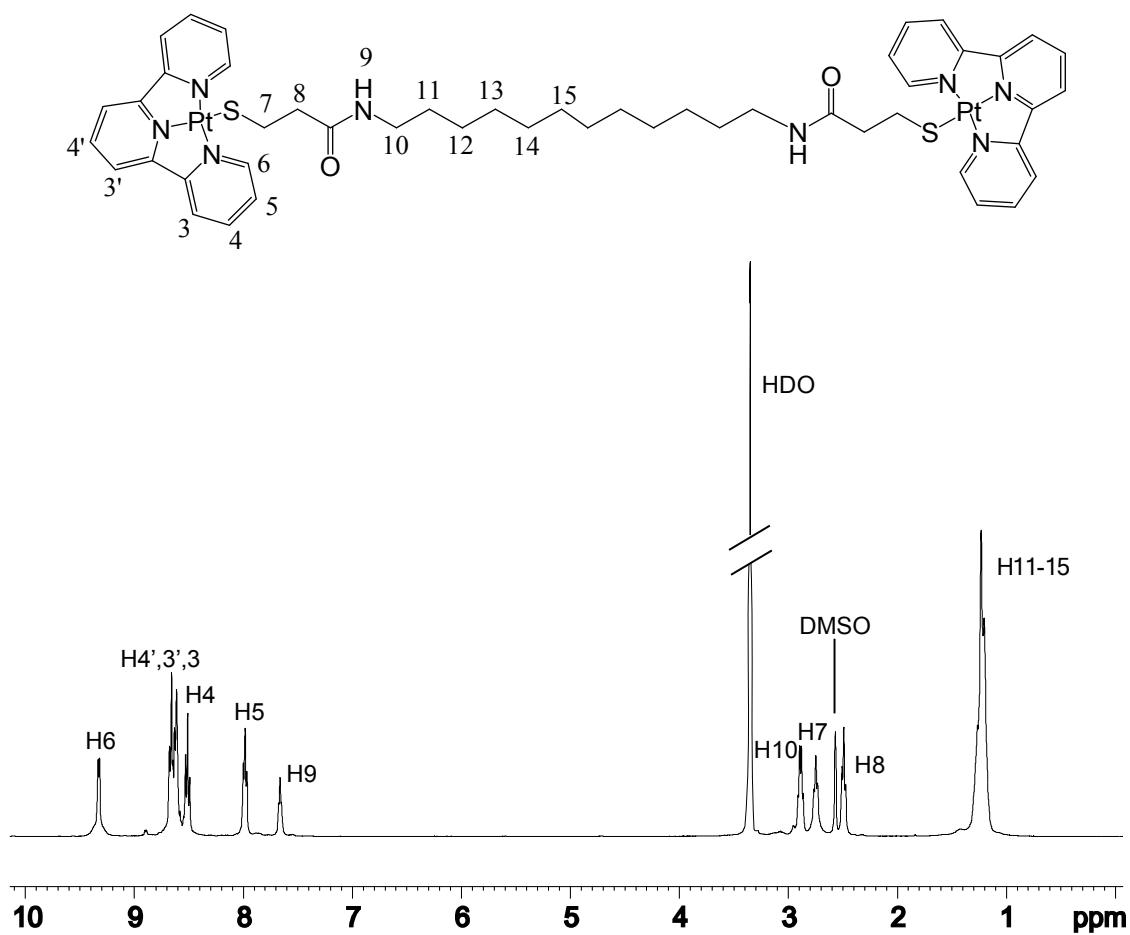

**Figure S-22:** The chemical structure, numbering and  $^1\text{H}$  spectrum of **8** in  $d_6$ -DMSO.

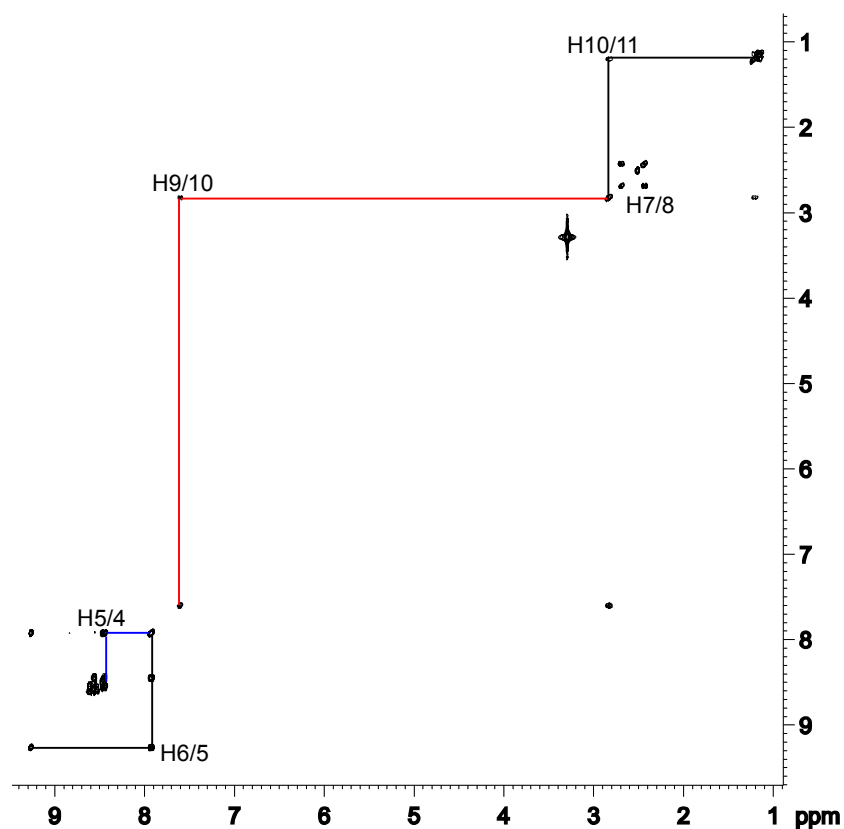

**Figure S-23:** The COSY spectrum of **8** in  $d_6$ -DMSO with lines of connectivity highlighting cross correlations.

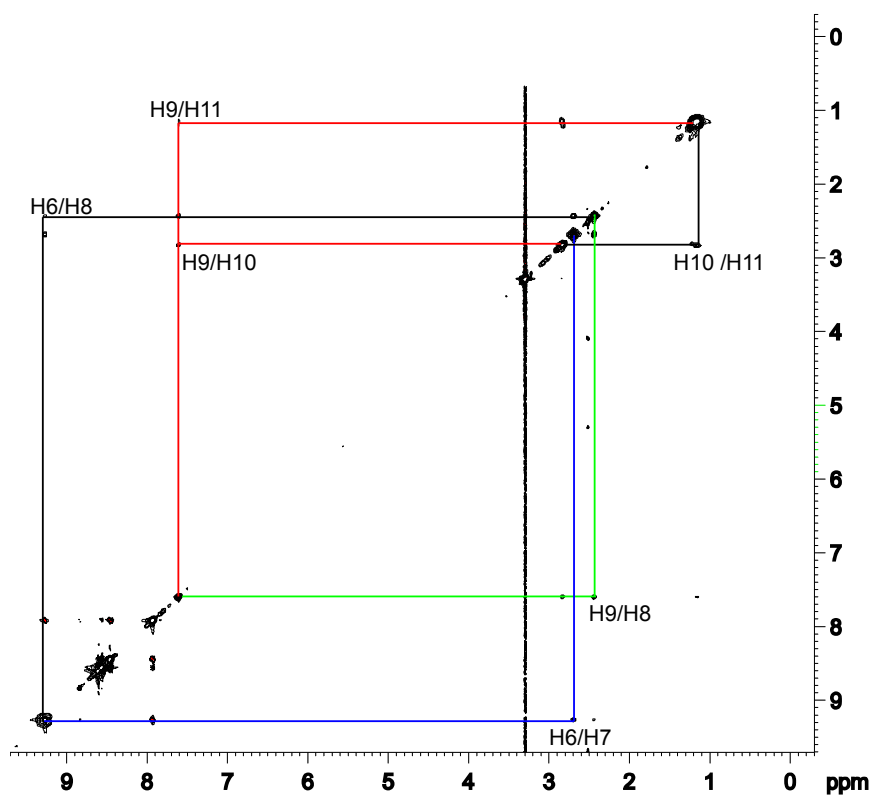

**Figure S-24:** The ROESY spectrum of **8** in  $d_6$ -DMSO with lines of connectivity highlighting cross correlations.

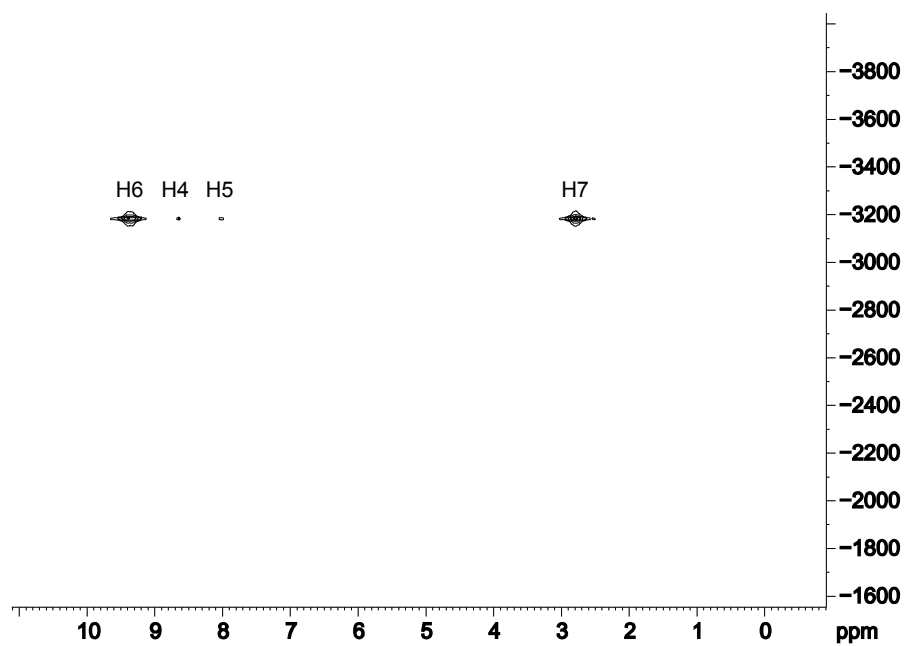

**Figure S-25:** The  $^1\text{H}$ - $^{195}\text{Pt}$  HMQC spectrum of **8** in *d*<sub>6</sub>-DMSO.

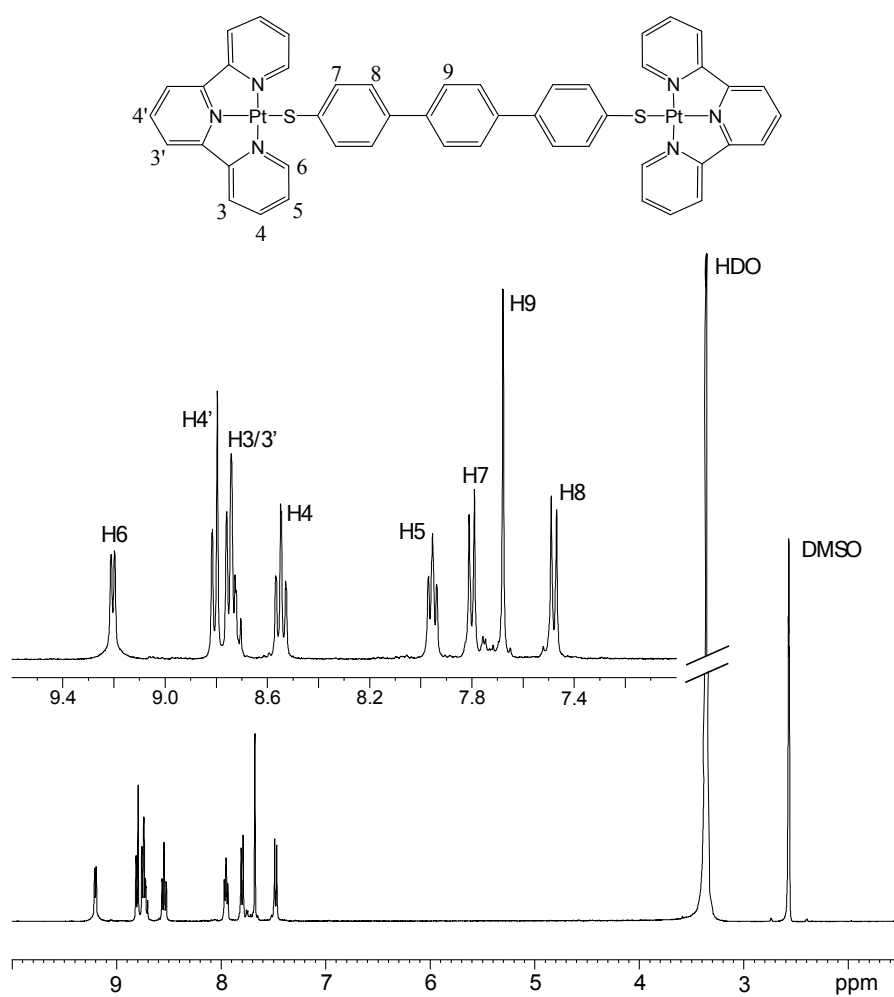

**Figure S-46:** The  $^1\text{H}$  spectrum of **9** in  $d_6$ -DMSO. Inset: The expansion of the aromatic region between 7.4 and 9.4 ppm.

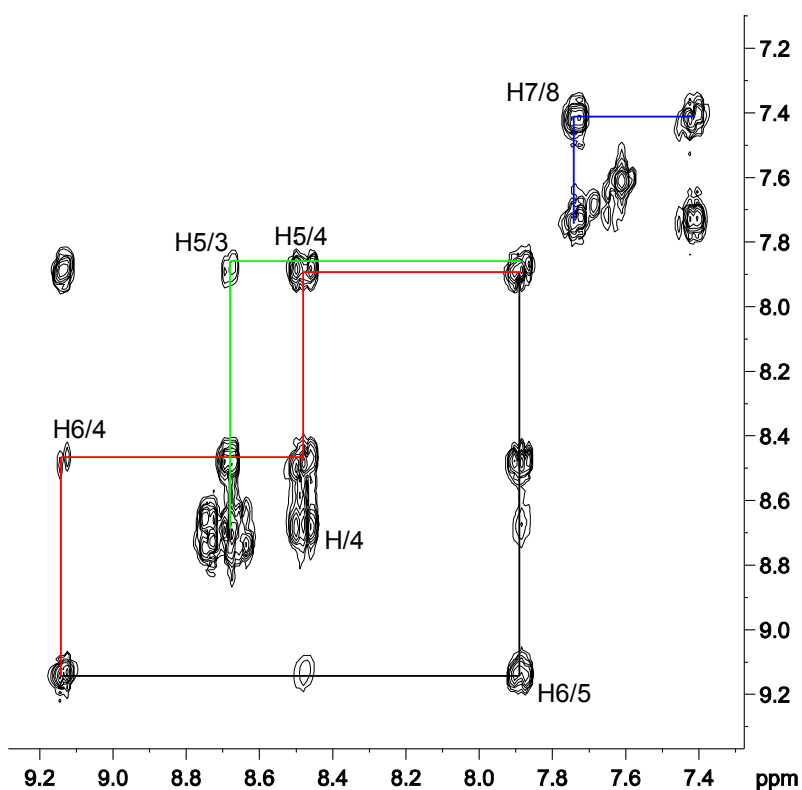

**Figure S-47:** The COSY spectrum of **9** in  $d_6$ -DMSO with lines of connectivity highlighting cross correlations.

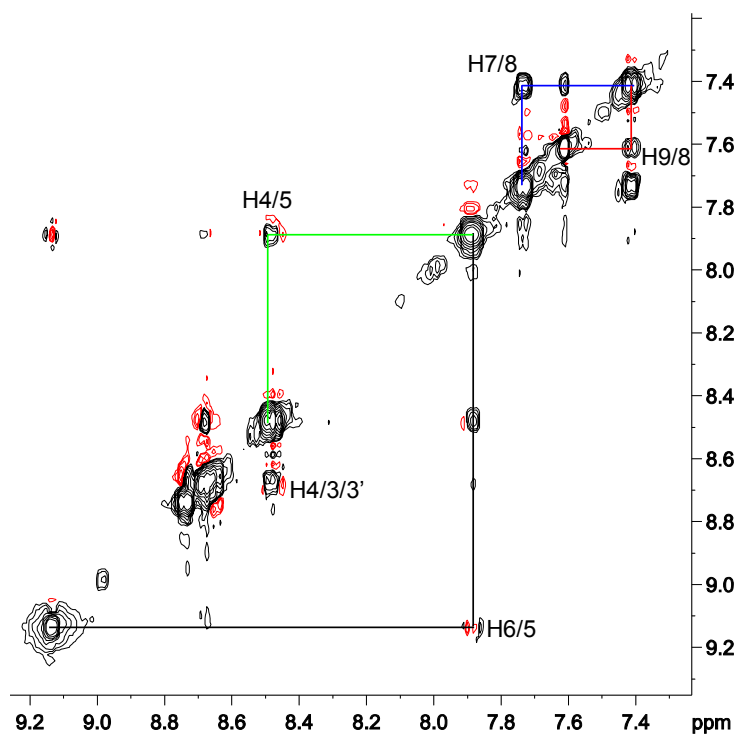

**Figure S-48:** The NOESY spectrum of **9** in  $d_6$ -DMSO with lines of connectivity highlighting cross correlations.

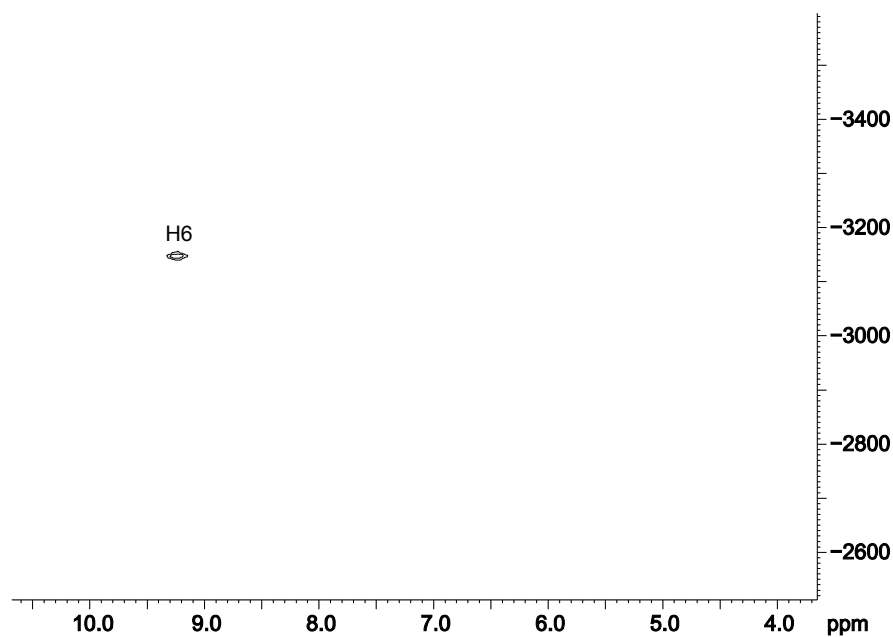

Figure S-49: The  $^1\text{H}$ - $^{195}\text{Pt}$  HMQC spectrum of **9** in  $d_6$ -DMSO.

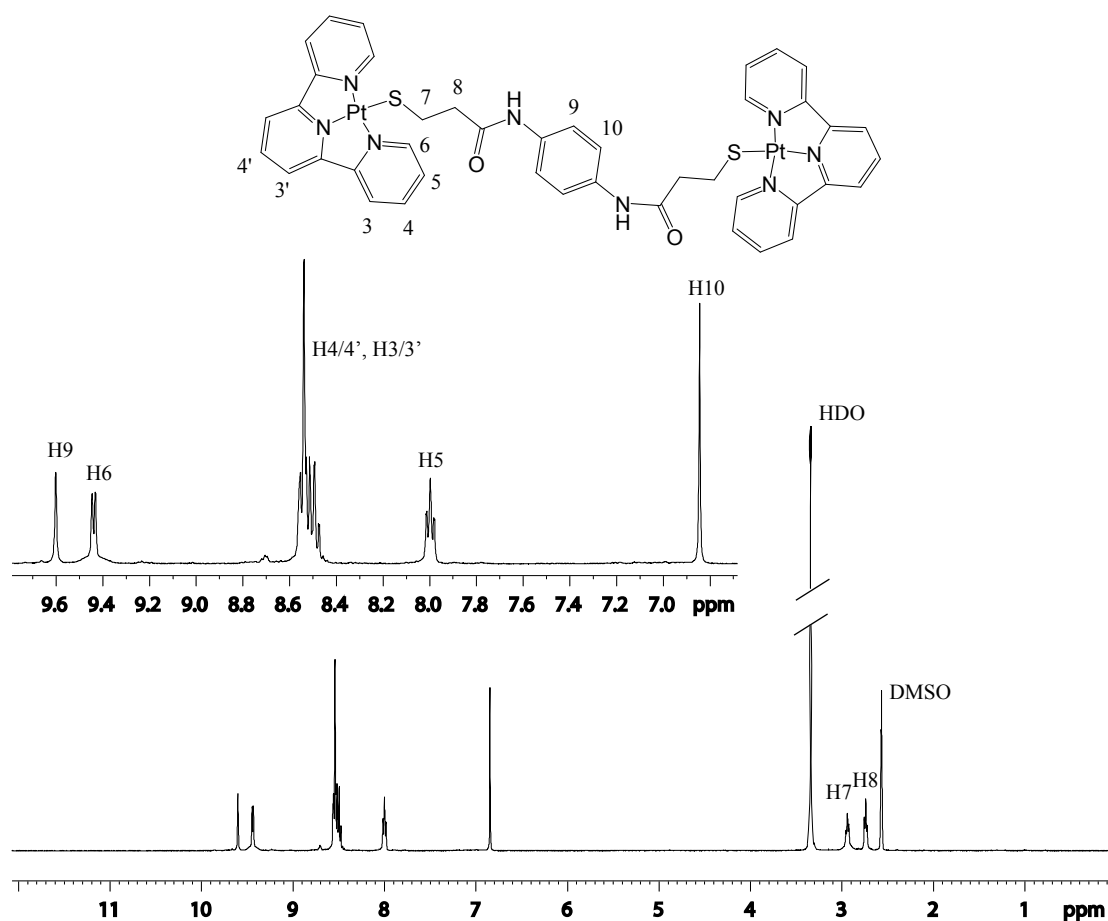

Figure S-26: The chemical structure, numbering and  $^1\text{H}$  spectrum of **10** in  $d_6$ -DMSO. Inset: The expansion of the aromatic region between 6.8 and 9.6 ppm.

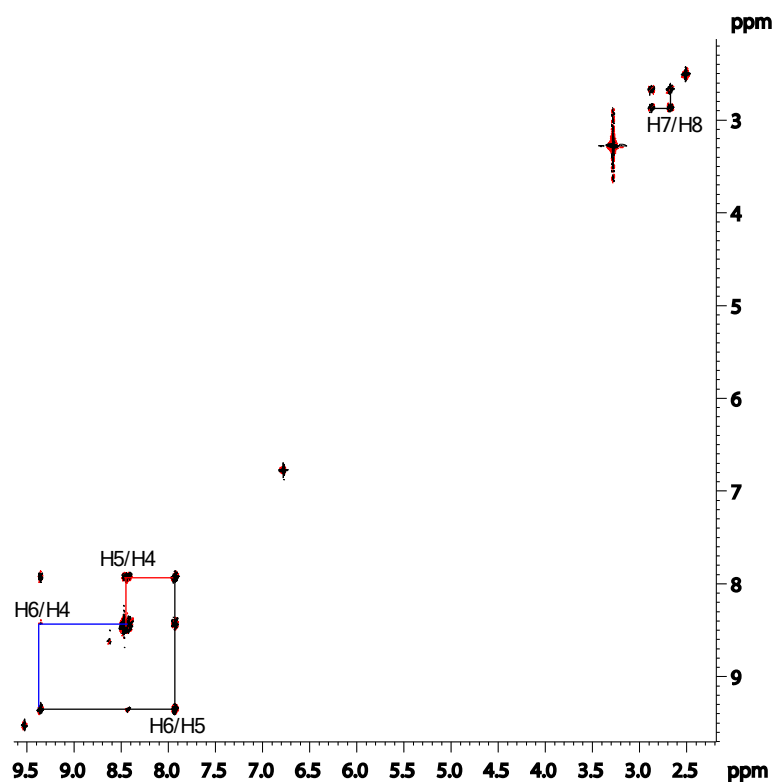

**Figure S-27:** The COSY spectrum of **10** in  $d_6$ -DMSO with lines of connectivity highlighting cross correlations.

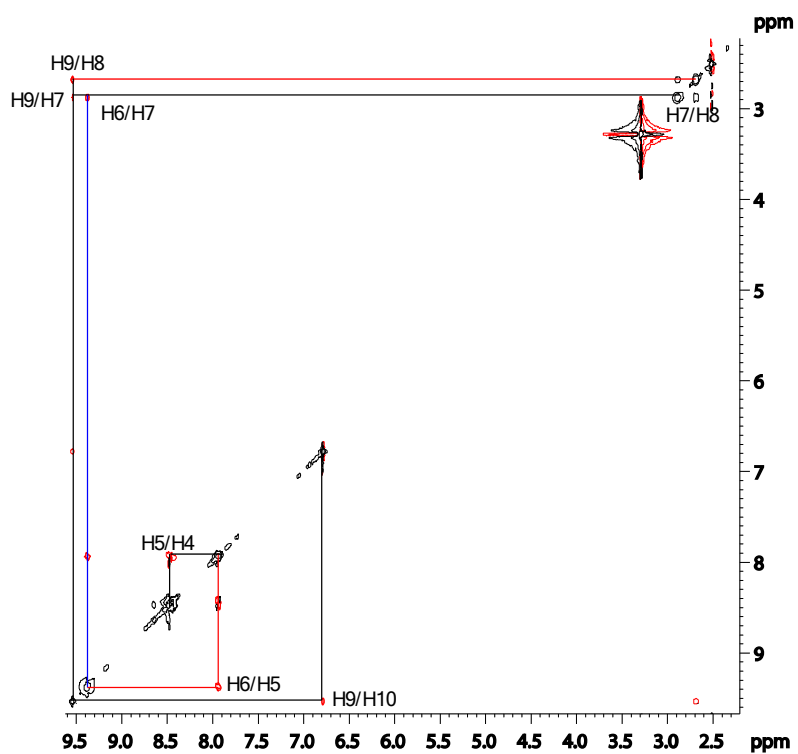

**Figure S-28:** The ROESY spectrum of **10** in  $d_6$ -DMSO with lines of connectivity highlighting cross correlations.

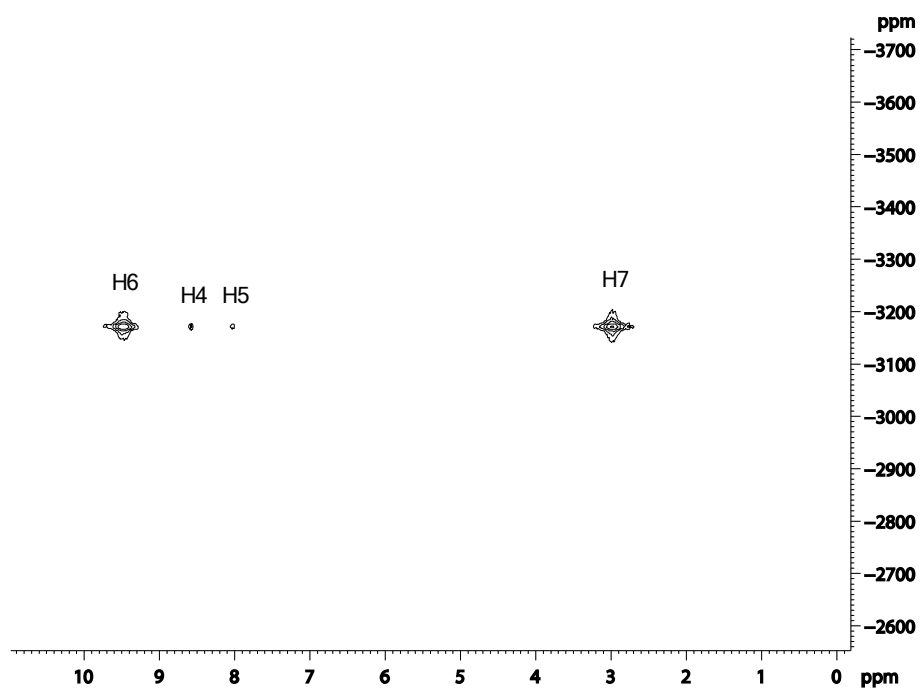

**Figure S-29:** The  $^1\text{H}$ - $^{195}\text{Pt}$  HMQC spectrum of **10** in  $d_6$ -DMSO.

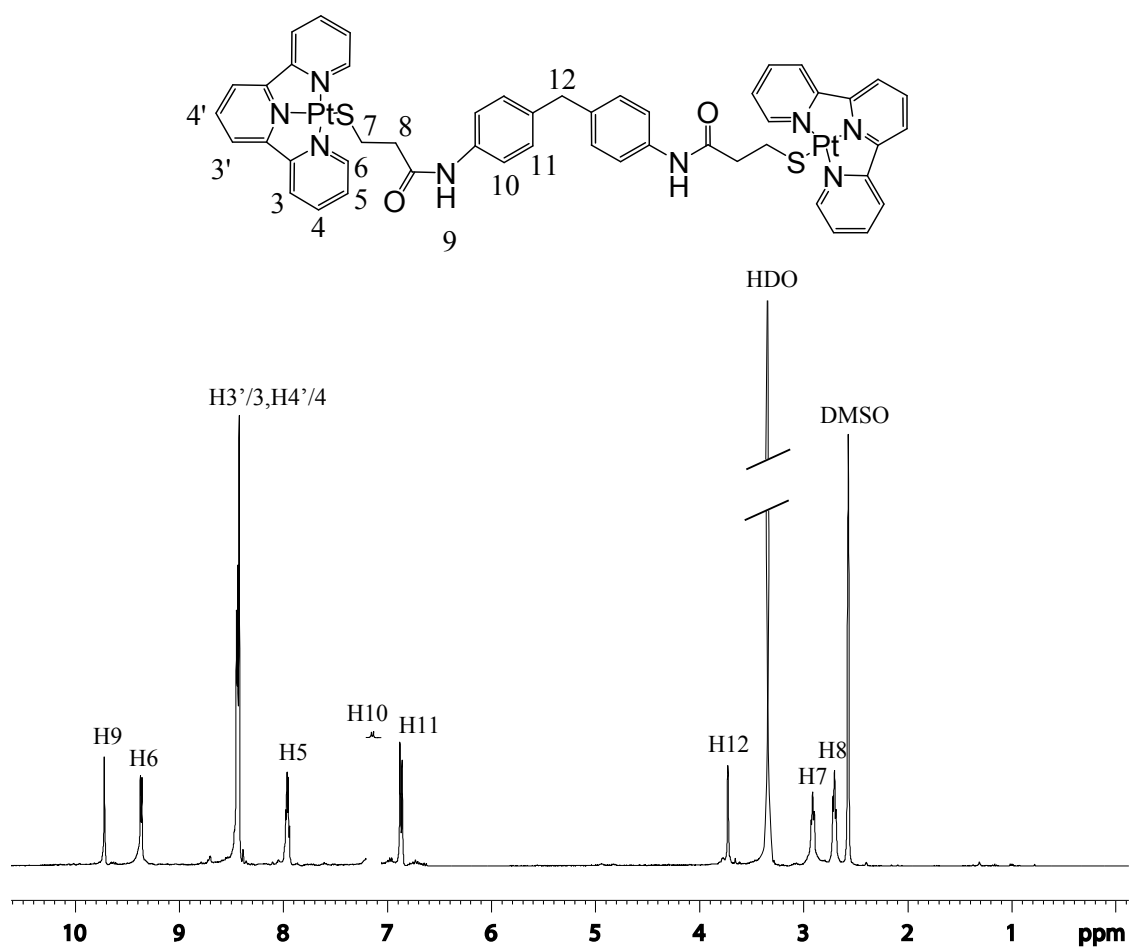

**Figure S-30:** The chemical structure, numbering and  $^1\text{H}$  spectrum of **11** in  $d_6$ -DMSO.

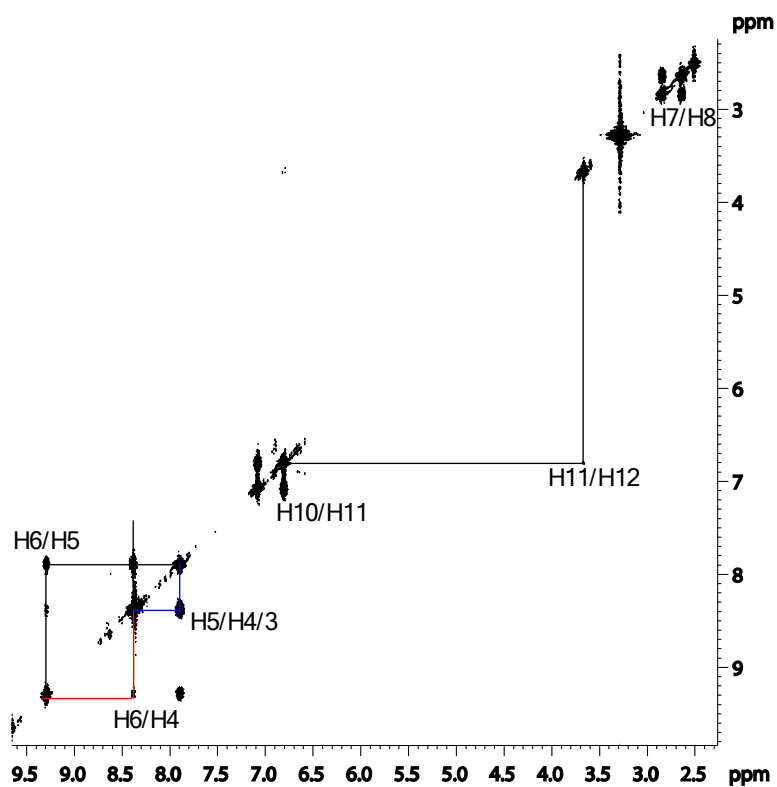

**Figure S-31:** The COSY spectrum of **11** in  $d_6$ -DMSO with lines of connectivity highlighting cross correlations.

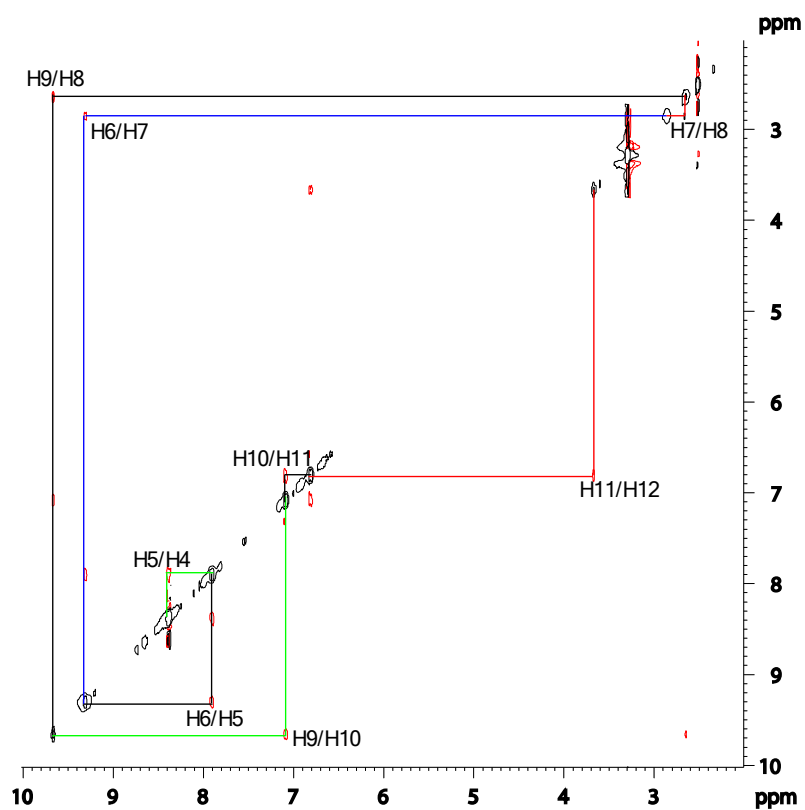

**Figure S-32:** The ROESY spectrum of **11** in  $d_6$ -DMSO with lines of connectivity highlighting cross correlations.



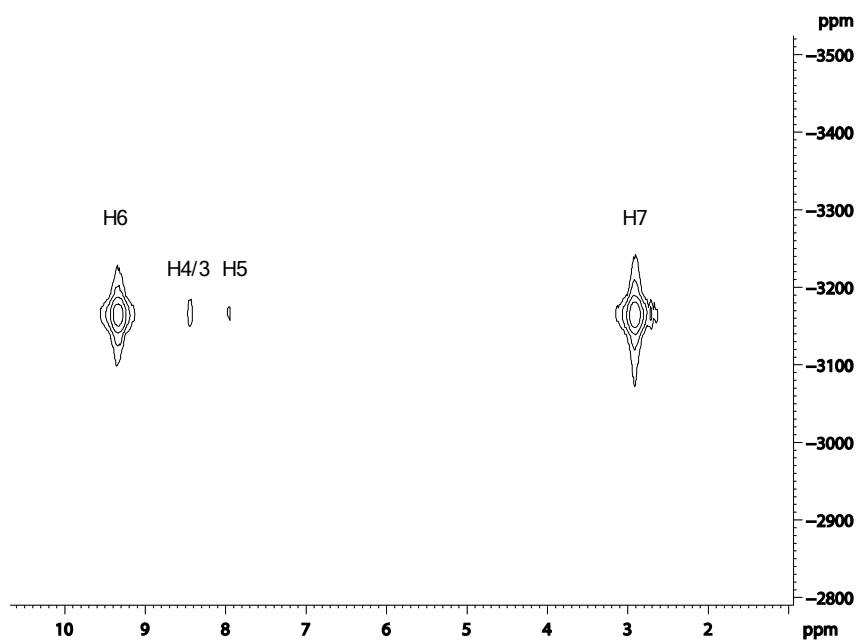

**Figure S-33:** The  $^1\text{H}$ - $^{195}\text{Pt}$  HMQC spectrum of **11** in  $d_6$ -DMSO.

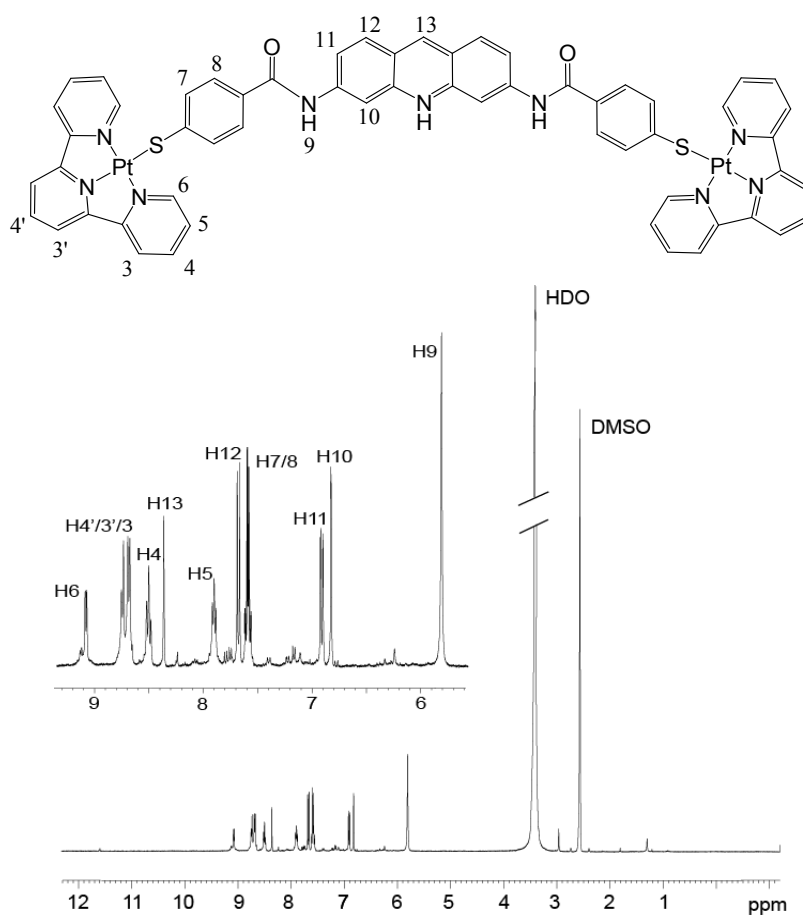

**Figure S-5:** The chemical structure, numbering and  $^1\text{H}$  spectrum of **12** in  $d_6$ -DMSO. Inset: The expansion of the aromatic region between 6.5 and 10.5 ppm.

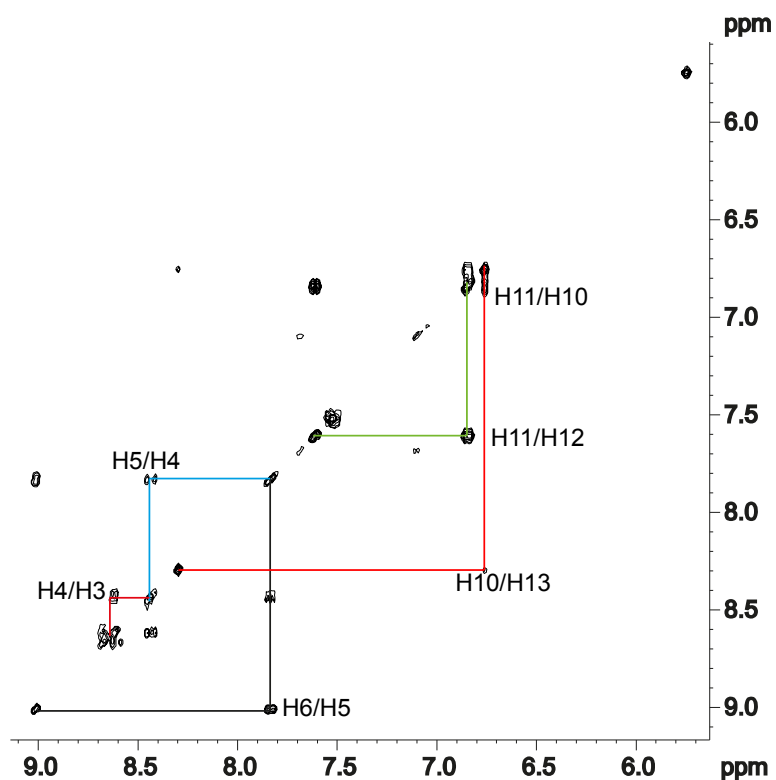

**Figure S-6:** The COSY expansion spectrum of **12** in  $d_6$ -DMSO with lines of connectivity highlighting cross correlations.

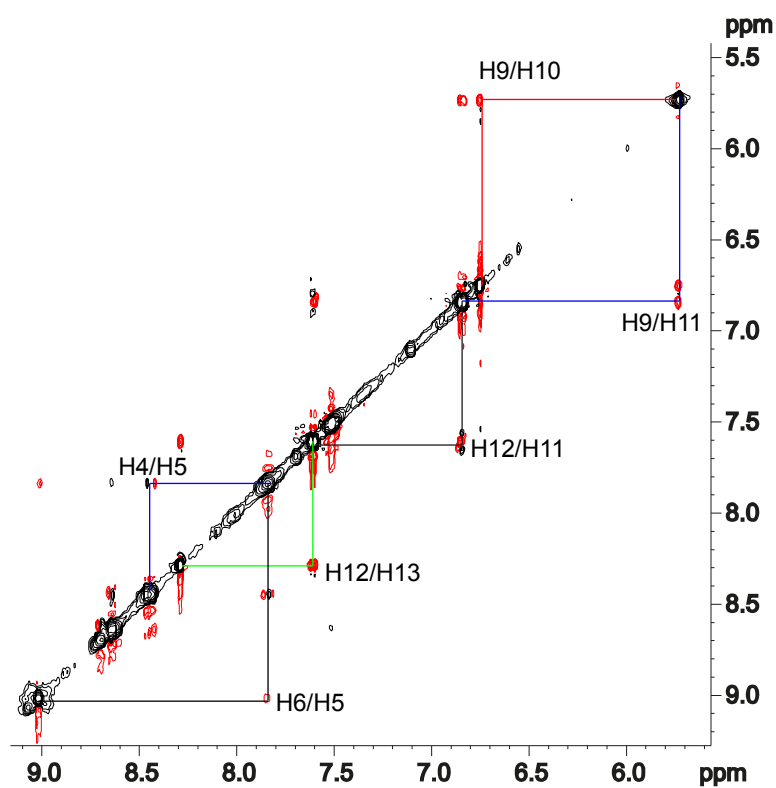

**Figure S-7:** The NOESY expansion spectrum of **12** in  $d_6$ -DMSO with lines of connectivity highlighting cross correlations.

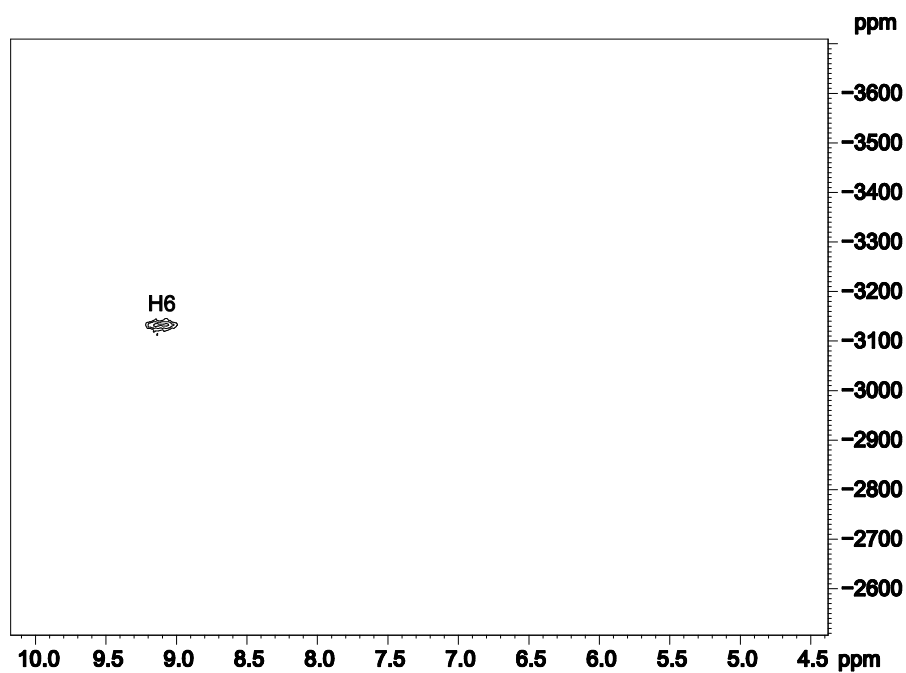

Figure S-8: The  $^1\text{H}$ - $^{195}\text{Pt}$  HMQC spectrum of **12** in  $d_6$ -DMSO.

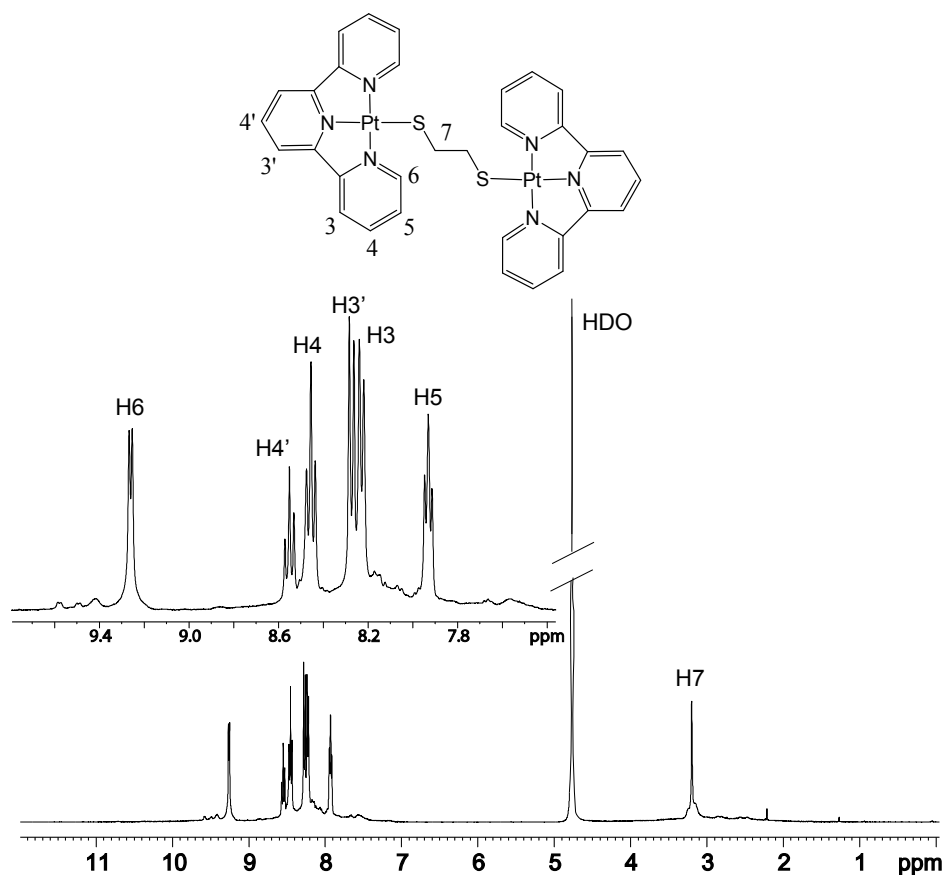

Figure S-34: The chemical structure, numbering and  $^1\text{H}$  spectrum of **13** in  $\text{D}_2\text{O}$ . Inset: The expansion of the aromatic region between 7.8 and 9.4 ppm.

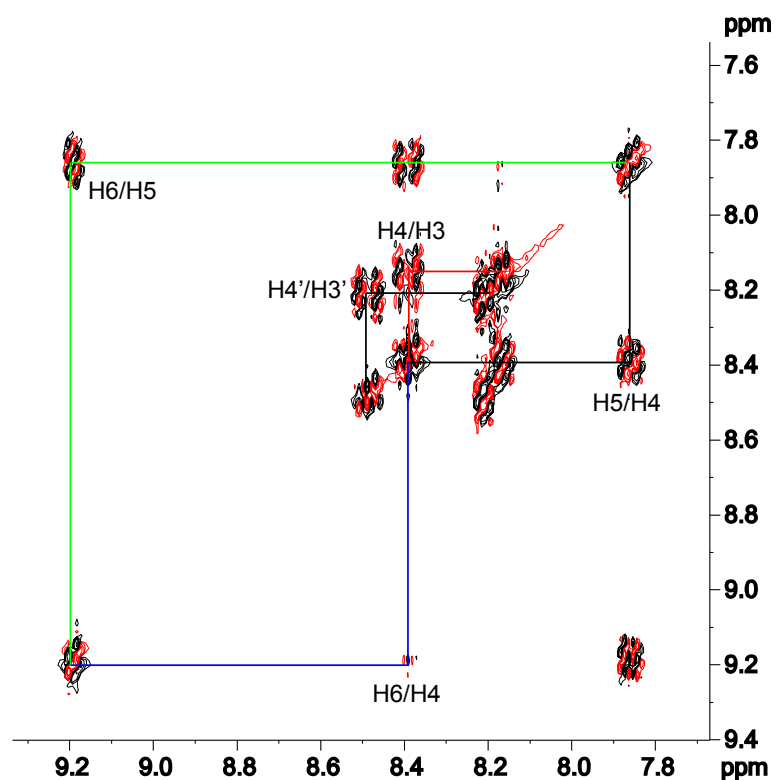

**Figure S-35:** The expanded COSY spectrum of **13** in D<sub>2</sub>O with lines of connectivity highlighting cross correlations.

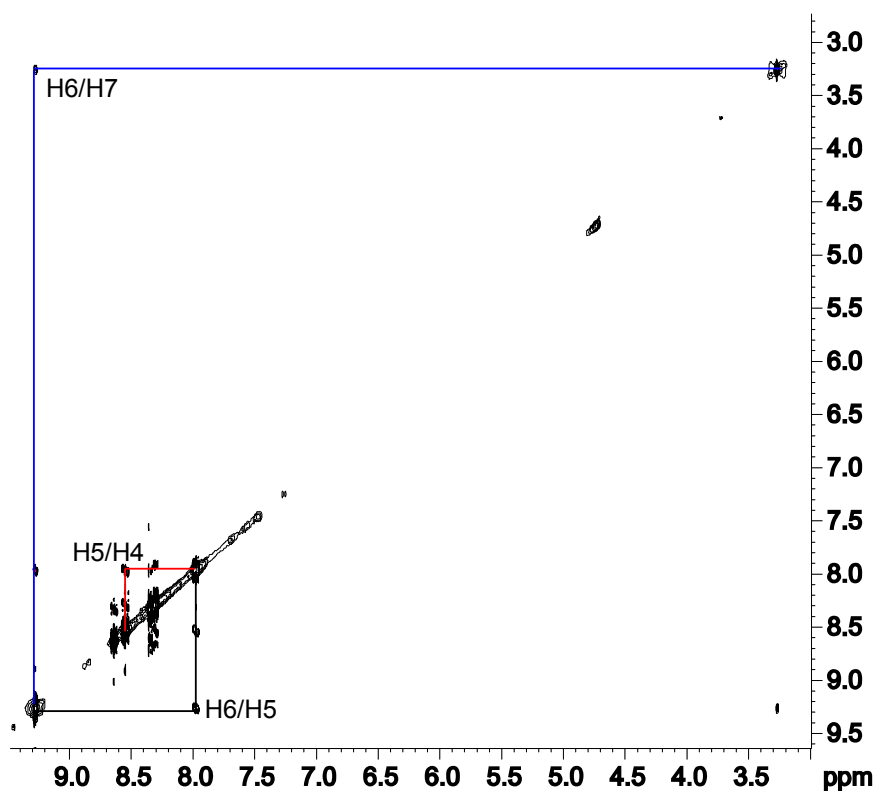

**Figure S-36:** The ROESY spectrum of **13** in D<sub>2</sub>O with lines of connectivity highlighting cross correlations.

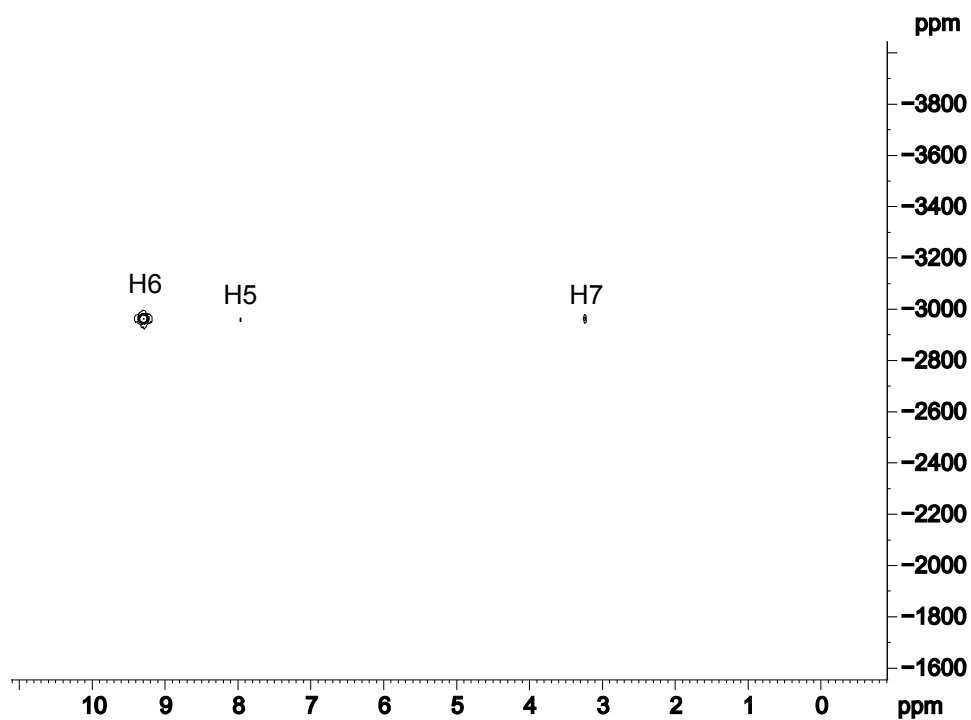

**Figure S-37:** The  $^1\text{H}$ - $^{195}\text{Pt}$  spectrum of **13** in  $d_6$ -DMSO.

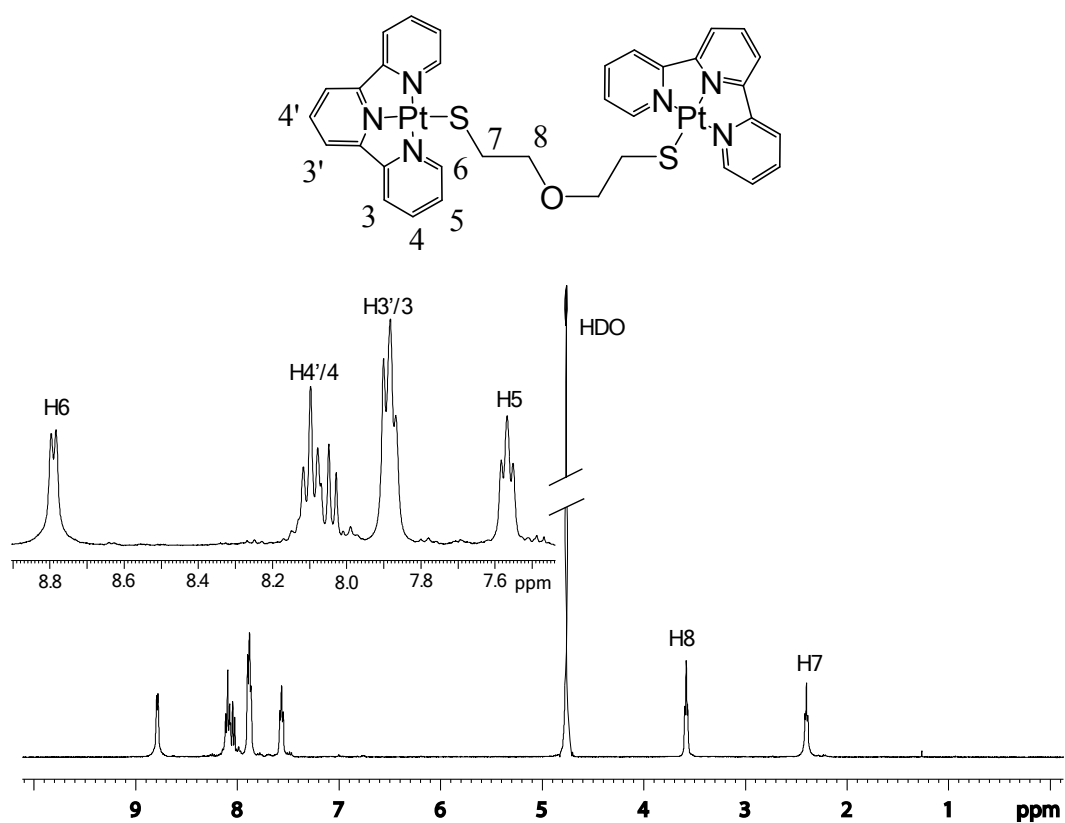

**Figure S-38:** The chemical structure, numbering and  $^1\text{H}$  spectrum of **14** in  $d_6$ -DMSO. Inset: The expansion of the aromatic region between 7.5 and 8.8 ppm.

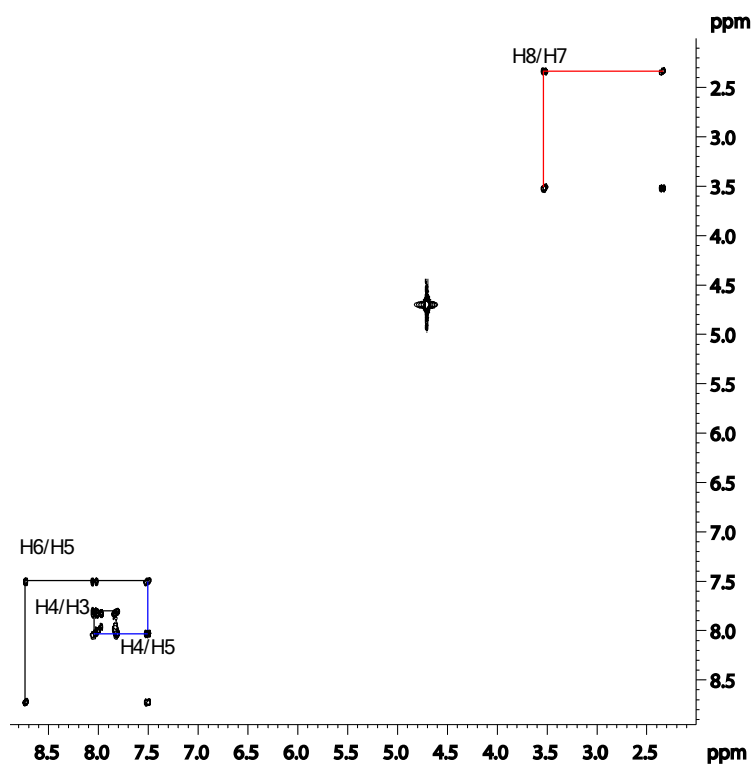

**Figure S-39:** The COSY spectrum of **14** in  $d_6$ -DMSO with lines of connectivity highlighting cross correlations.

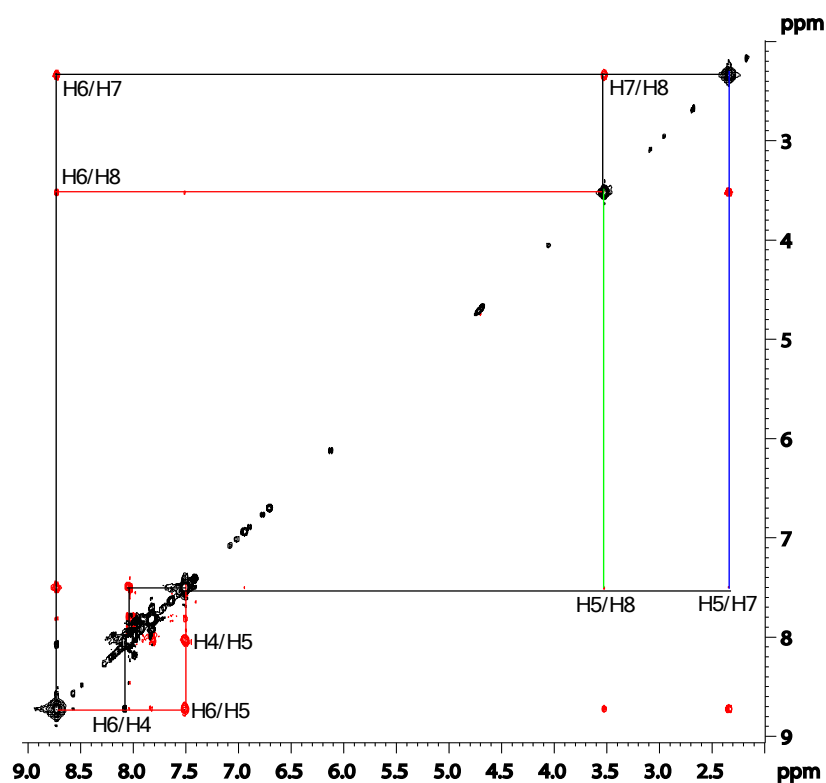

**Figure S-40:** The ROESY spectrum of **14** in  $d_6$ -DMSO with lines of connectivity highlighting cross correlations.

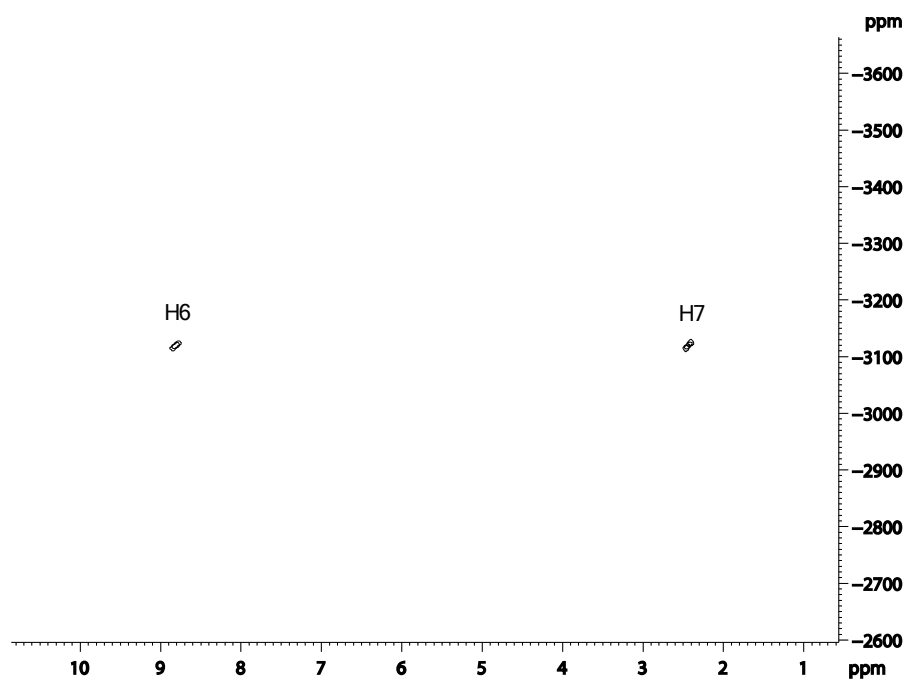

**Figure S-41:** The  $^1\text{H}$ - $^{195}\text{Pt}$  HMQC spectrum of **14** in  $d_6$ -DMSO.

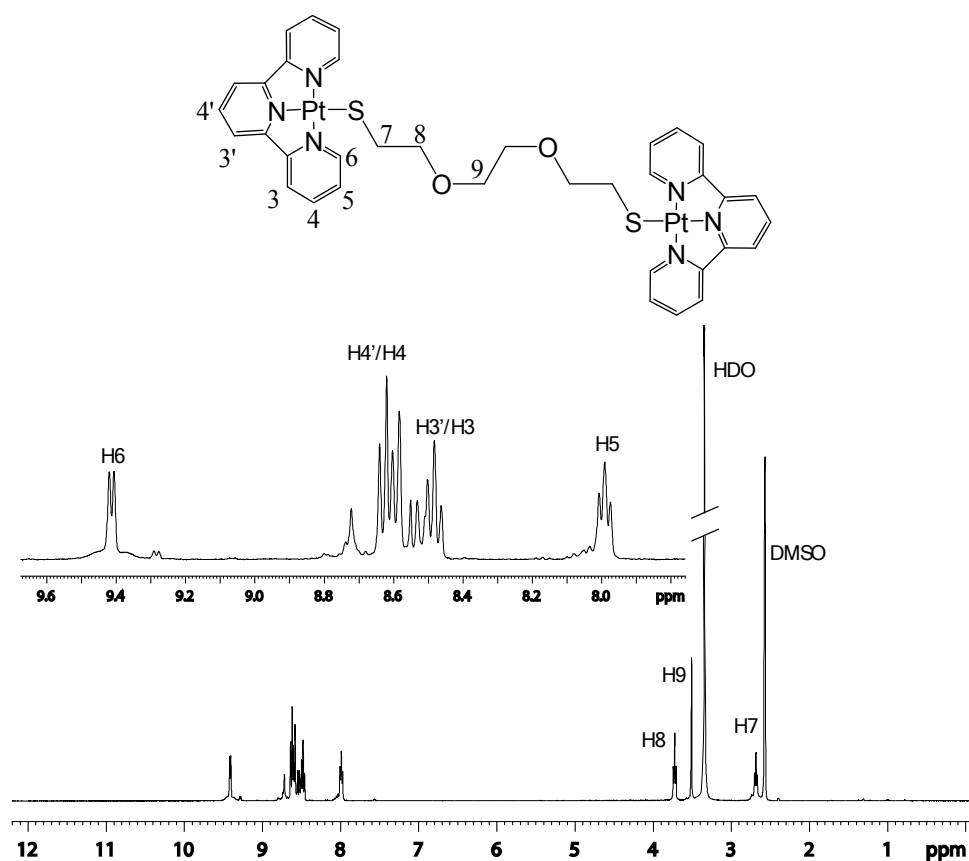

**Figure S-42:** The chemical structure, numbering and  $^1\text{H}$  spectrum of **15** in  $d_6$ -DMSO. Inset: The expansion of the aromatic region between 8.0 and 9.5 ppm.

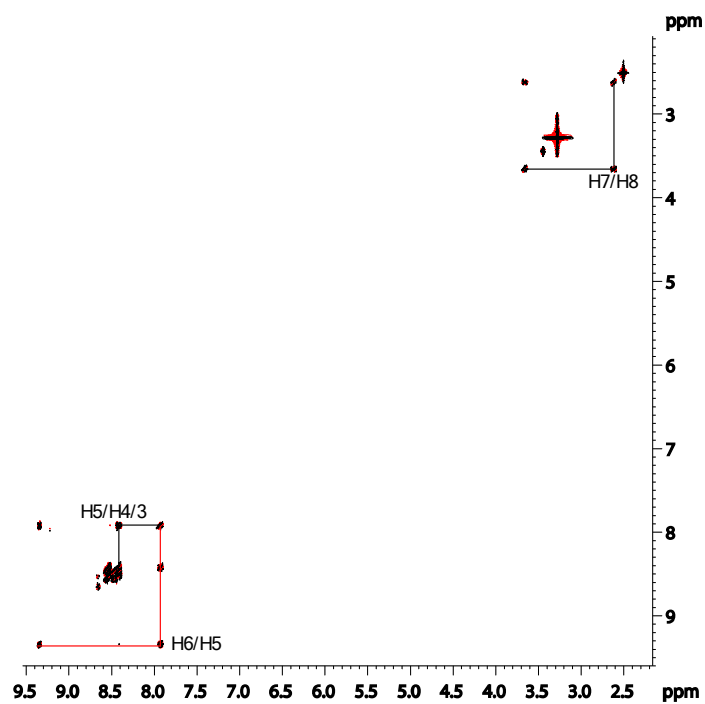

**Figure S-43:** The COSY spectrum of **15** in  $d_6$ -DMSO with lines of connectivity highlighting cross correlations.

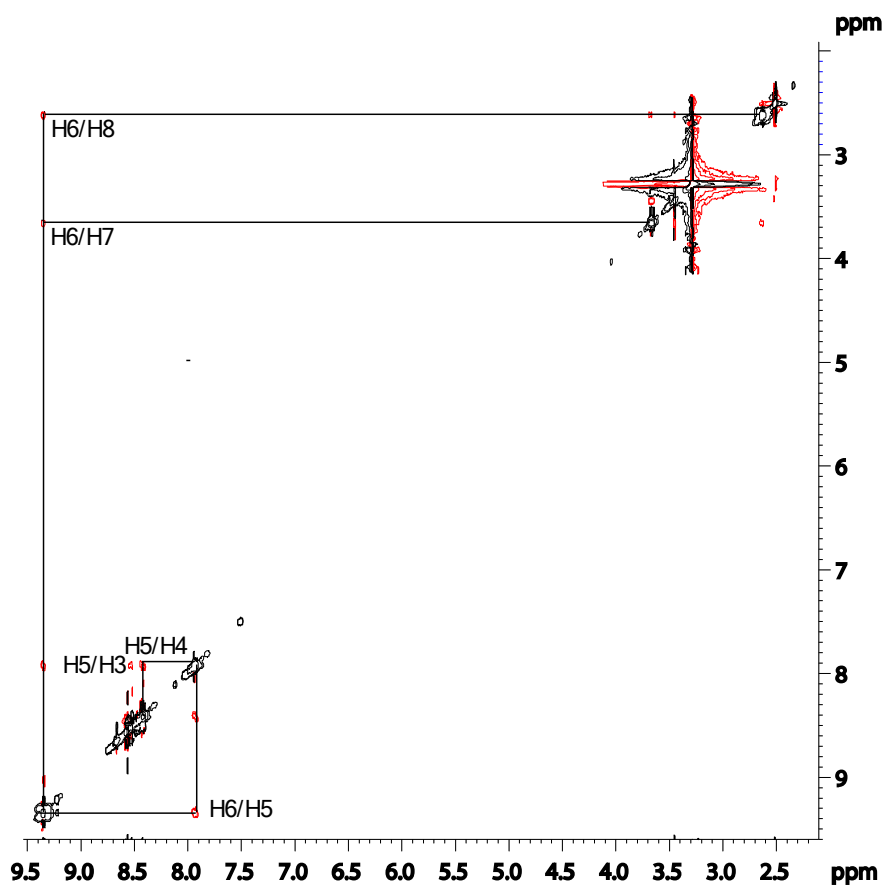

**Figure S-44:** The ROESY spectrum of **15** in  $d_6$ -DMSO with lines of connectivity highlighting cross correlations.



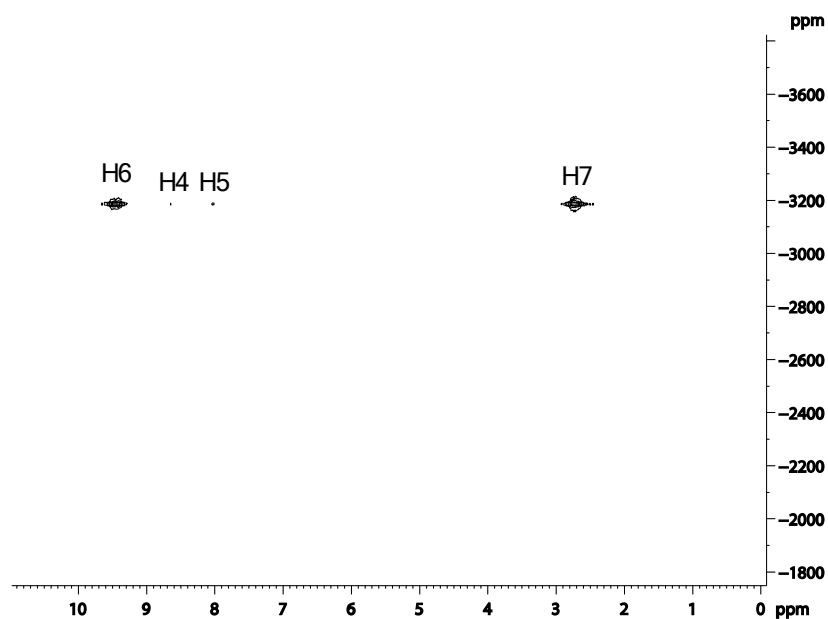

**Figure S-45:** The  $^1\text{H}$ - $^{195}\text{Pt}$  HMQC spectrum of **15** in  $d_6$ -DMSO.

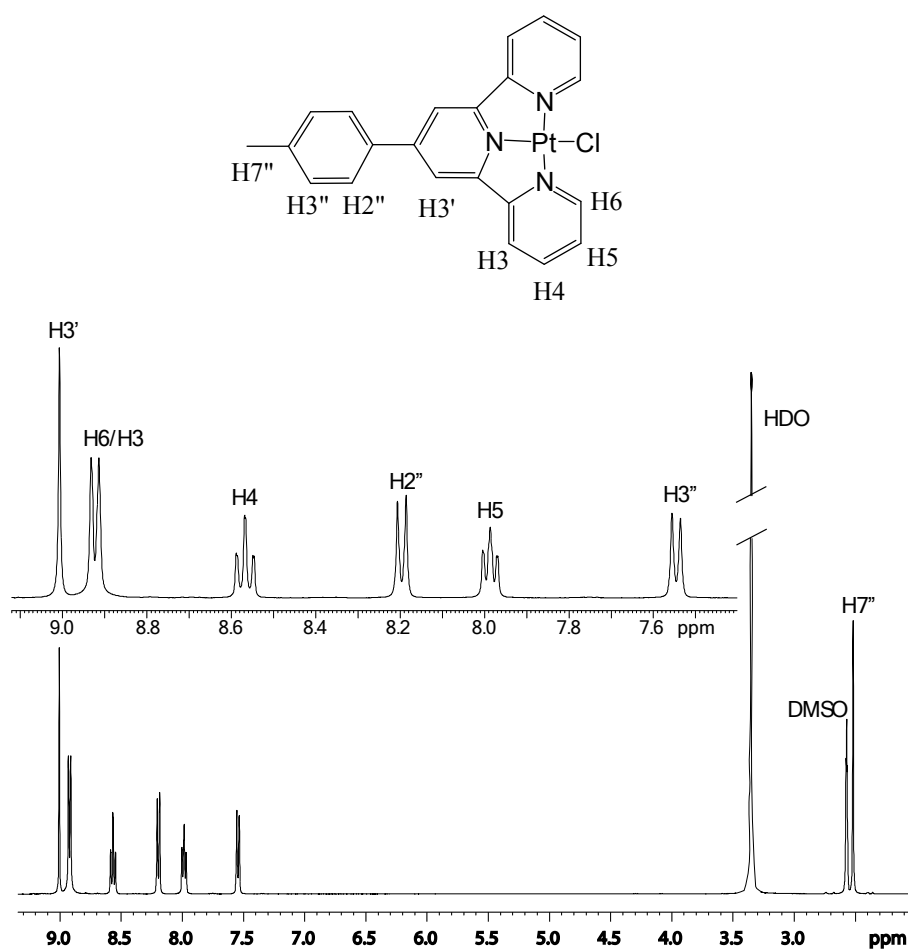

**Figure S-62:** The chemical structure, numbering and  $^1\text{H}$  spectrum of  $[\text{Pt}(4'\text{MPterpy})\text{Cl}]\text{Cl}$  in  $d_6$ -DMSO. Inset: The expansion of the aromatic region between 7.5 and 9.0 ppm.

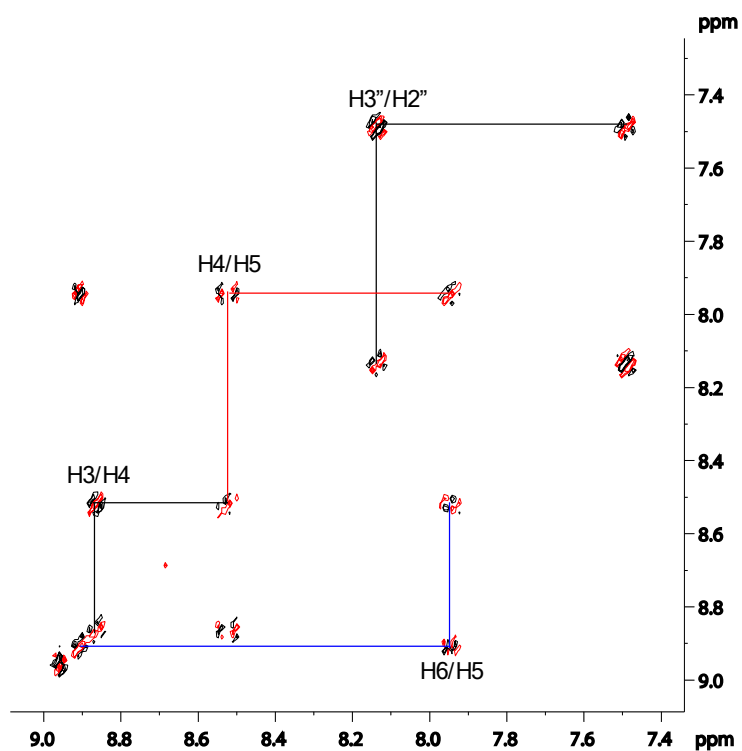

**Figure S-63:** The COSY spectrum of [Pt(4'MPterpy)Cl]Cl in  $d_6$ -DMSO with lines of connectivity highlighting cross correlations.

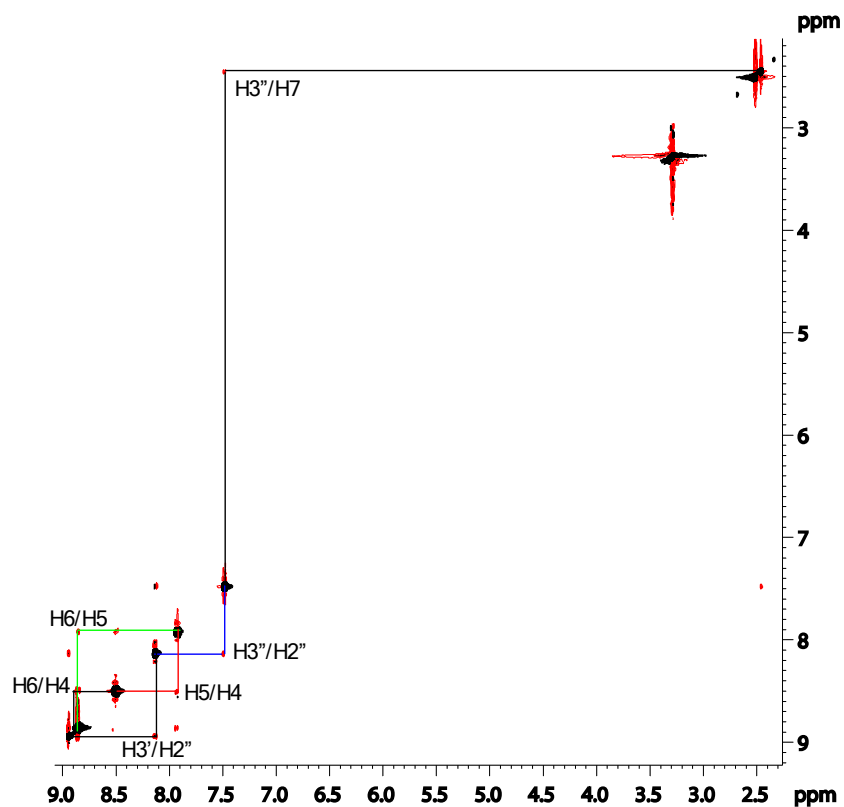

**Figure S-64:** The NOESY spectrum of [Pt(4'MPterpy)Cl]Cl in  $d_6$ -DMSO with lines of connectivity highlighting cross correlations.

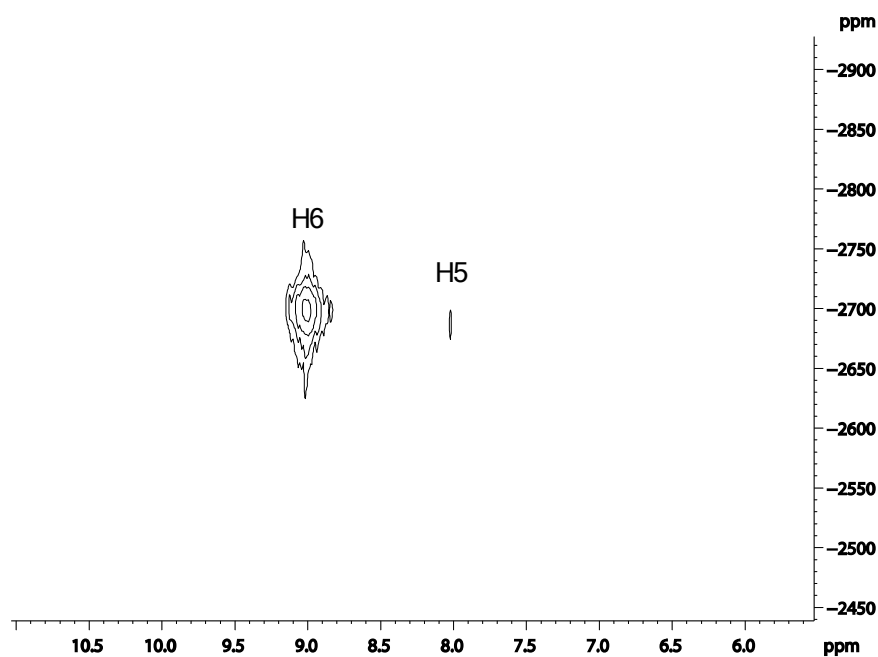

**Figure S-65:** The  $^1\text{H}$ - $^{195}\text{Pt}$  HMQC spectrum of  $[\text{Pt}(4'\text{MPterpy})\text{Cl}]\text{Cl}$  in  $d_6$ -DMSO.

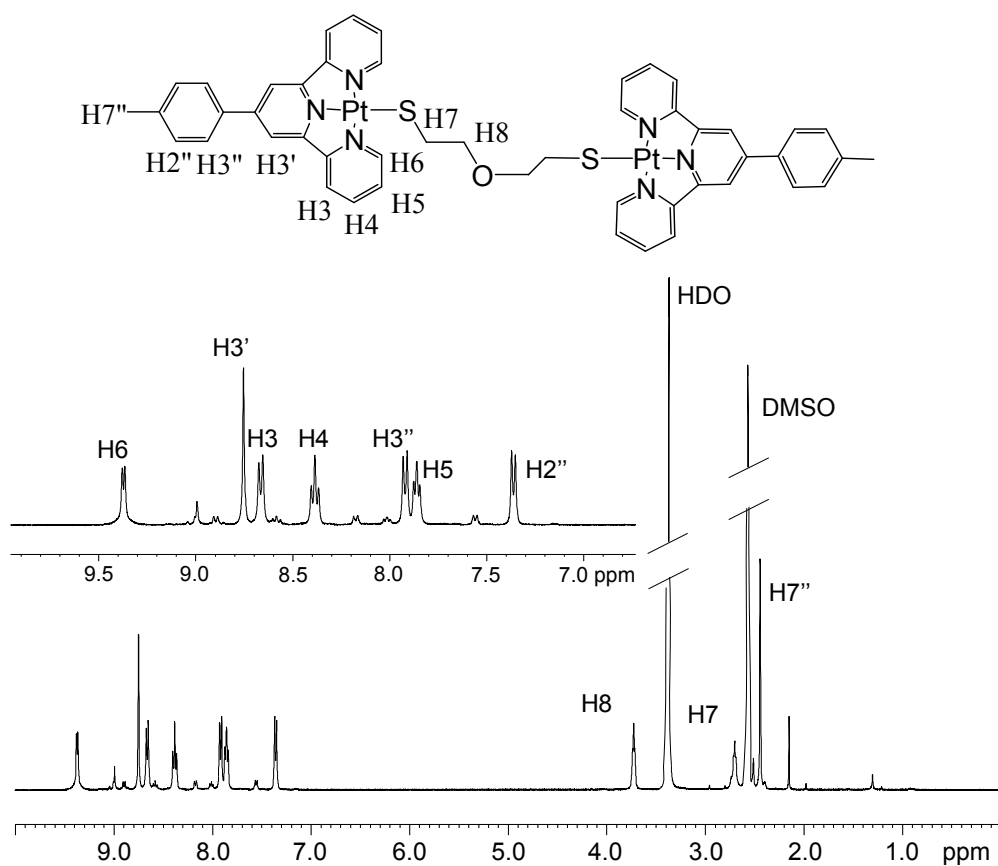

**Figure S-66:** The chemical structure, numbering and  $^1\text{H}$  spectrum of **16** in  $d_6$ -DMSO. Inset: The expansion of the aromatic region between 7.0 and 9.5 ppm.

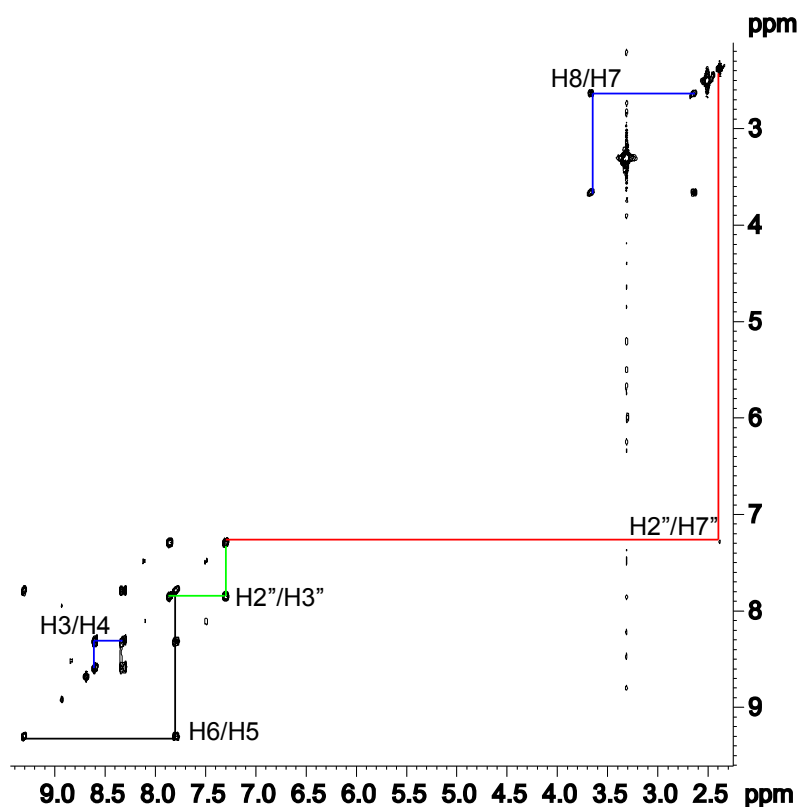

**Figure S-67:** The COSY spectrum of **16** in  $d_6$ -DMSO with lines of connectivity highlighting cross correlations.

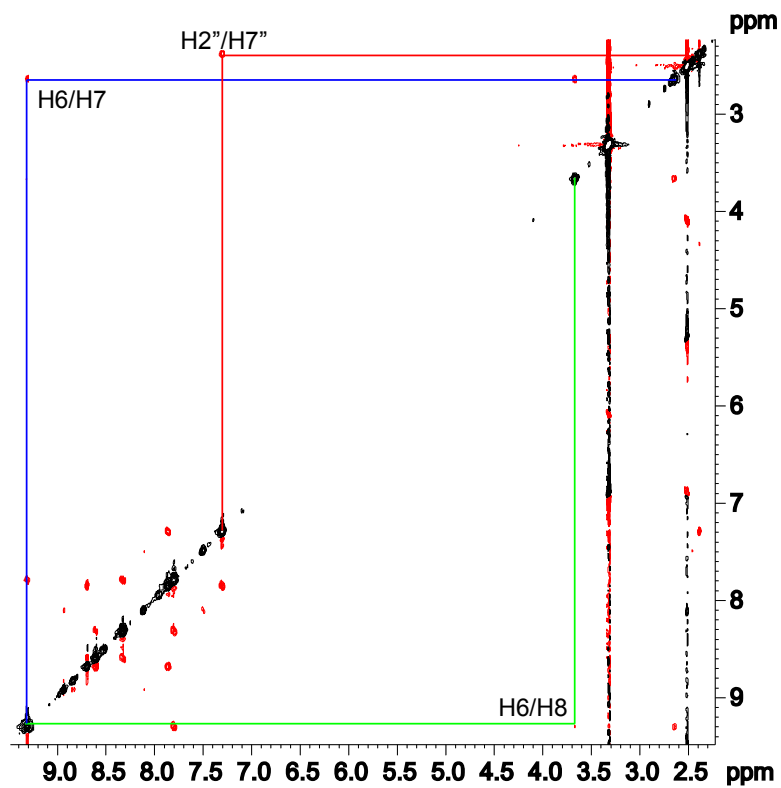

**Figure S-68:** The ROESY spectrum of **16** in  $d_6$ -DMSO with lines of connectivity highlighting cross correlations.

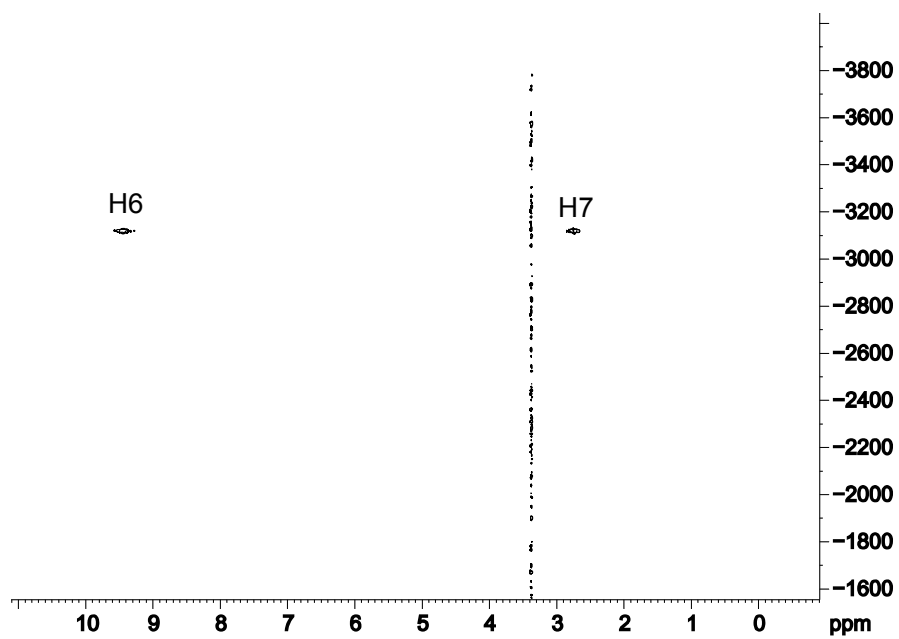

**Figure S-69:**  $^1\text{H}$ - $^{195}\text{Pt}$  HMQC spectrum of **16** in  $d_6$ -DMSO.
